# Air pollution control efficacy and health impacts: A global observed study from 2000 to 2016

Chunlei Han<sup>1,2</sup>, Rongbin Xu<sup>2</sup>, Yajuan Zhang<sup>3</sup>, Wenhua Yu<sup>2</sup>, Shanshan Li<sup>2</sup>, Zhongwen Zhang<sup>1</sup>, Lidia Morawska<sup>4</sup>, Jane Heyworth<sup>5</sup>, Bin Jalaludin<sup>6</sup>, Geoffrey Morgan<sup>7</sup>, Guy Marks<sup>8</sup>, Michael Abramson<sup>2</sup>, Liwei Sun<sup>1</sup>, and Yuming Guo<sup>1,2\*</sup>

1 School of Public Health and Management, Binzhou Medical University, Yantai, Shandong, China

2 Department of Epidemiology and Preventive Medicine, School of Public Health and Preventive Medicine, Monash University, Melbourne, Australia

3 School of Public Health and Management, Ningxia Medical University, Yinchuan, Ningxia Hui Autonomous Region, China

4 International Laboratory for Air Quality and Health, Brisbane, Queensland University of Technology, Queensland, Australia; & Science and Engineering Faculty, Queensland University of Technology, Brisbane, Queensland, Australia

5 School of Population and Global Health, The University of Western Australia, Crawley, Western Australia, Australia

6 School of Public Health and Community Medicine, The University of New South Wales, Kensington, 2052, Australia

7 Faculty of Medicine and Health, Sydney School of Public Health, The University of Sydney, Sydney, NSW 2006, Australia

8 South Western Sydney Clinical School UNSW, Sydney, New South Wales, Australia

\* Corresponding author: Yuming Guo, [Yuming.Guo@monash.edu](mailto:Yuming.Guo@monash.edu).

## Abstract

**Background:** PM<sub>2.5</sub> concentrations vary between countries with similar CO<sub>2</sub> emissions, possibly due to differences in air pollution control efficacy. However, no indicator of the level of air pollution control efficacy has yet been developed. We aimed to develop such an indicator, and to evaluate its global and temporal distribution and its association with country-level health metrics.

**Method:** A novel indicator, ground level population-weighted average PM<sub>2.5</sub> concentration per unit CO<sub>2</sub> emission per capita ( $PM_{2.5}/CO_2$ , written as PC in abbreviation), was developed to assess country-specific air pollution control efficacy. We estimated and mapped the global average distribution of PC and PC changes during 2000-2016 across 196 countries. Pearson correlation coefficients and Generalized Additive Mixed Model (GAMM) were used to evaluate the relationship between PC and health metrics.

**Results:** PC varied by country with an inverse association with the economic development. PC showed an almost stable trend globally from 2000 to 2016 with the low income groups increased. The Pearson correlation coefficients between PC and life expectancy at birth (LE), Infant-mortality rate (IMR), Under-five mortality rate (U5MR) and logarithm of GDP per capita (LPGDP) were -0.566, 0.646, 0.659, -0.585 respectively (all P-values <0.001). Compared with PM<sub>2.5</sub> or CO<sub>2</sub>, PC could explain more variation of LE, IMR and U5MR. The association between PC and health metrics was independent of GDP per capita.

**Conclusions:** PC might be a good indicator for air pollution control efficacy and was related to important health indicators. Our findings provide a new way to interpret health inequity across the globe from the point of air pollution control efficacy.

**Keywords:** air pollution, climate change, health inequity, air pollution control efficacy

51 **1. Introduction**

52 Ambient air pollution is a major public health concern. Among all ambient air pollutants, the  
53 particulate matter with aerodynamic diameter  $\leq 2.5\mu\text{m}$  (PM<sub>2.5</sub>) is the most important one that poses  
54 significant adverse health impacts in both short-term and long-term[1,2]. At the same time, carbon  
55 dioxide (CO<sub>2</sub>) emissions have increased rapidly along with the rapid growth of economic development  
56 requiring more energy for transportation and energy consumption. As both ground level PM<sub>2.5</sub> and CO<sub>2</sub>  
57 are mainly caused by fossil-fuel combustion [3], there might be a relationship between CO<sub>2</sub> emission  
58 and ground level PM<sub>2.5</sub> concentration [4]. Studies conclude that actions to reduce greenhouse gas  
59 emissions often lead to co-benefits for air quality [5]. But interestingly, ground level PM<sub>2.5</sub>  
60 concentrations are quite different across countries with similar CO<sub>2</sub> emissions [4]. Many low- and  
61 middle-income countries (LMICs) face the dual pressure of reducing both ground level PM<sub>2.5</sub>  
62 concentrations and CO<sub>2</sub> emissions[5], while high income countries (HICs) have much lower ground  
63 level PM<sub>2.5</sub> concentrations despite their high greenhouse gas emissions[6]. In other words,  
64 economically developed countries generally have lower ground level PM<sub>2.5</sub> concentrations and  
65 relatively good air quality compared with economically developing countries, despite their similar or  
66 even higher CO<sub>2</sub> emissions[7]. This fact suggests that different countries have different abilities to  
67 control ambient air pollution, even with similar CO<sub>2</sub> emissions. An indicator to reflect the air pollution  
68 control efficacy may provide important information for policymakers, in order to achieve climate and  
69 air quality co-benefits and help guide environmental policy development and implementation [8].

70  
71 The combustion sources of ground level PM<sub>2.5</sub> concentrations are different across countries.  
72 Ground level PM<sub>2.5</sub> concentrations are substantially from residential energy use such as heating and  
73 cooking in China, India, Bangladesh, Indonesia, Vietnam and Nepal; from traffic in Germany, the UK  
74 and the USA; from power generation in the USA, Russia, Korea, Turkey and the Middle East; from  
75 agriculture in Europe, Russia, Turkey, Korea, Japan and the Eastern USA[9]. Energy structure and  
76 environmental technology are both determinants of air pollution control efficacy. Environmental  
77 technological progress can enhance energy efficiency, thereby leading to reductions in ground level  
78 PM<sub>2.5</sub> concentrations [4,10]. Developed countries may have more economic foundation to promote and  
79 apply technological innovation to reduce both CO<sub>2</sub> emission and ground level PM<sub>2.5</sub> concentration  
80 compared with developing countries. In developed countries such as North America and Europe,  
81 technological improvements in scrubbers on power plants, catalytic converters on motor vehicles, and  
82 increased development of non-fossil fuel based energy sources have reduced ground level PM<sub>2.5</sub>  
83 concentrations [11]. Although emission reduction technologies play a role in improving air quality in  
84 economically developing countries like China [12], not all effective strategies are adopted due to the  
85 high cost[13].

86  
87 Cleaner air due to air pollution reduction will improve human health[13]. Correspondingly,  
88 inequality in air pollution control efficacy contributes to human health inequality between  
89 countries[14]. An indicator of air pollution control efficacy could help identify the ground level air  
90 pollution concentration co-benefits of reducing emissions of CO<sub>2</sub> [15]. The quantitative relationship  
91 between the air pollution control efficacy indicator and human health might provide important  
92 guidance for policymakers to reduce the disease burden due to ambient air pollution globally [4].

93 Currently, there is no indicator to reflect country level air pollution control efficacy. To fill the  
94 research gap, we aim to evaluate a potential novel indicator of air pollution control efficacy, by  
95 quantifying its global distribution and long-term trend, and by examining its relationship with health  
96 indicators. Monitoring such an indicator may assist policy makers to better manage climate change and  
97 air pollution problems simultaneously [5].

98 **2. Materials and methods**

99 *2.1 Indicator*

100 To capture air pollution control efficacy with CO<sub>2</sub> emission, we proposed a novel indicator,  
101 ground level population weighted PM<sub>2.5</sub> concentration per unit CO<sub>2</sub> emission per capita (PC). A lower  
102 PC value generally indicates a higher air pollution control efficiency, meaning lower concentration of

103 ground level PM<sub>2.5</sub> with per unit of CO<sub>2</sub> emission. The unit of PC is µg/m<sup>3</sup> per tonne. PC is  
104 calculated as follows:

$$PC_{i,t} = PM_{2.5\ i,t}/CO_{2\ i,t}$$

105 Here, i means the i<sup>th</sup> country or region, t means the t<sup>th</sup> year.

## 106 2.2. Data collection

107 The spatial and temporal domain of our study included 196 countries from 2000 and 2016. Some  
108 regions like Greenland, Antarctica and some countries in Middle Africa were not included in the spatial  
109 map because of the missing data.

110  
111 To develop the novel indicator of air pollution control efficacy, population-weighted ground level  
112 PM<sub>2.5</sub> (PM<sub>2.5</sub>, µg/m<sup>3</sup>) and annual emissions of carbon dioxide per capita (CO<sub>2</sub>, tonne) for individual  
113 countries based on territorial CO<sub>2</sub> emissions were sourced from the atmospheric composition analysis  
114 group, Global Carbon Project, Carbon Dioxide Information Analysis Centre (CDIAC), Gapminder and  
115 UN population estimates(see supplement for more details). PM<sub>2.5</sub> in each country was represented by  
116 the population density weighted average value of all grids within the boundary of the country[16]. We  
117 transformed the original spatial resolution of this population density dataset into 0.1°×0.1° resolution  
118 according to the method described by Brauer et al[17].

119  
120 To evaluate the association between PC and health, we collected data on several health outcomes.  
121 The first one is life expectancy at birth (LE, years), defined as the average number of years that a  
122 newborn could expect to live if he or she were to pass through life subject to the age-specific mortality  
123 rates of a given period. Children are more affected by air pollution and climate change [3,18]. It was  
124 reported that per 10 µg/m<sup>3</sup> increases in PM<sub>2.5</sub> concentration was related to 3.4% (95% CI: 1.7%–5.4%)  
125 infant and child under-five mortality[19]. Therefore,we included the health outcomes of infant-  
126 mortality rate (IMR, ‰) and under-five mortality rate (U5MR, ‰),which mean the number of infants  
127 dying before reaching one year of age and the number of babies that died before reaching age five per  
128 1,000 live births in a given year. We obtained data of LE, IMR, U5MR from various sources including  
129 the United Nations (UN) Population Division, World Bank(WB), UN Inter-agency Group for Child  
130 Mortality Estimation, World Health Organization (WHO) (see supplement for more details).

131 Temperature and humidity are related to health [20] and country-level annual average  
132 Temperature at 2 meters (T2M,°C) and Specific Humidity at 2 Meters (QV2M, g water/kg dry air, g  
133 kg-1) were obtained from the National Aeronautics and Space Administration (NASA) (see supplement  
134 in details). GDP per capita (PGDP, U.S.\$) in constant 2010 U.S. dollars came from WB and the  
135 Organization for Economic Co-operation and Development (OECD) (see supplement for more details).

## 136 2.3 Statistical Methods

137 Correlations between each two independent variables were examined by Pearson correlation  
138 coefficient. The Generalized Additive Mixed Model (GAMM) with a penalized spline smoothing  
139 function, a random intercept of country and spatial covariance structure, and a Gaussian link function,  
140 was used to evaluate the potential non-linear relationship between PC and health outcomes [21,22].

141  
142 To ensure the results' robustness, we excluded 5% observations with extreme large and small PC  
143 and kept the remaining 95% data in the middle for analyses. The model performance was expressed as  
144 adjusted R<sup>2</sup>. The GAMM was as following:

$$H_{i,t} = \beta_0 + s(PC_{i,t}) + s(D_{i,t}) + u_i$$

145  
146 Here  $H$  represents the health outcome, which could be LE, IMR, or U5MR;  $i,t$  means the  $i^{\text{th}}$   
147 country( $i=1$  to 196) in the  $t^{\text{th}}$  ( $t=2000$  to 2016) year.  $\beta_0$  denotes the constant intercept;  $s(\cdot)$  is the  
148 smoothing function realized by cubic spline with 4 degrees of freedom(df) in this study.  $u_i$  is a  
149 random intercept for country  $i$ .  $D$  represents the covariates including PGDP, T2M, QV2M, PM<sub>2.5</sub>, CO<sub>2</sub>.  
150 The degrees of freedom (df) of the cubic spline function (CS) for each predictor was selected by  
151 minimizing the Akaike information criterion (AIC) of the model [23-25].

152

153 PC showed nonlinear correlation with health metrics as estimated in this paper, so here PC was  
154 modelled by a non-linear function. PGDP, T2M, QV2M were added to the models in the form of a  
155 natural cubic smooth function as their relationship with health is often non-linear [26-28]. PM<sub>2.5</sub> and  
156 CO<sub>2</sub> were also included as covariates.

157

158 All statistical tests were two-sided, with a p-value of 0.05 as the indicator of the statistical  
159 significance. All analyses were performed using the R statistical software (version 3.2.2), including the  
160 R packages “ggplot2”, “dplyr”, “reldist” and “gamma4”.

### 161 3. Results

#### 162 3.1 Descriptive results

163 The means of PM<sub>2.5</sub> and CO<sub>2</sub> were 21.52 (µg/m<sup>3</sup>) and 4.60 (tonne) respectively. PC was 74.24  
164 (µg/m<sup>3</sup> per tonne) on average with the considerable international variance from 0.14 (µg/m<sup>3</sup> per tonne)  
165 in Australia (2010) to 2659.75 (µg/m<sup>3</sup> per tonne) in Chad (2002). The average LE, IMR and U5MR  
166 were 68.94 years, 2.97 ‰ and 4.27‰, respectively. PGDP was 15541.76 (U.S.\$) on average with a  
167 large range of 155795.00 (U.S.\$). As for average temperature and humidity, T2M was 18.33 (°C) and  
168 QV2M 10.03 (g kg<sup>-1</sup>) (see Table 1). Generally, PC was lowest in high income groups, and then upper-  
169 middle income groups, lower-middle income groups, and highest in low income groups[29]. The mean,  
170 median, standard deviation and range of PC were increasing as the GDP per capita decreased (Table  
171 S<sub>1</sub>).

172

173

**Table 1 Summary statistics of all variables in 196 countries between 2000 and 2016**

| Variable          | Unit                        | Mean     | Sd       | Min    | P <sub>25</sub> | P <sub>50</sub> | P <sub>75</sub> | Max       |
|-------------------|-----------------------------|----------|----------|--------|-----------------|-----------------|-----------------|-----------|
| PC                | µg/m <sup>3</sup> per tonne | 74.24    | 207.37   | 0.14   | 1.96            | 4.59            | 34.62           | 2659.75   |
| LE                | years                       | 68.94    | 9.30     | 38.70  | 62.97           | 71.47           | 75.62           | 83.80     |
| IMR               | ‰                           | 2.97     | 2.72     | 0.16   | 0.79            | 1.95            | 4.62            | 14.20     |
| U5MR              | ‰                           | 4.27     | 4.48     | 0.21   | 0.83            | 2.35            | 6.70            | 23.39     |
| PM <sub>2.5</sub> | µg/m <sup>3</sup>           | 21.52    | 17.89    | 0.50   | 7.80            | 17.20           | 27.30           | 111.30    |
| CO <sub>2</sub>   | tonne                       | 4.60     | 6.41     | 0.02   | 0.55            | 2.23            | 6.35            | 66.81     |
| PGDP              | U.S.\$                      | 15541.76 | 18191.91 | 349.00 | 2780.50         | 8651.00         | 22093.50        | 156144.00 |
| T2M               | °C                          | 18.33    | 8.63     | -9.61  | 10.44           | 21.21           | 25.78           | 30.28     |
| QV2M              | g kg <sup>-1</sup>          | 10.03    | 4.67     | 2.59   | 6.05            | 8.76            | 14.49           | 19.28     |

174 **Notes:** Sd: standard deviation; Min: minimum; P<sub>25</sub>,P<sub>50</sub>,P<sub>75</sub>:25<sup>th</sup>,50<sup>th</sup>,75<sup>th</sup> percentile respectively; Max:  
175 maximum; PC: PM<sub>2.5</sub> concentration per unit per capita CO<sub>2</sub> emission; LE: life expectancy at birth; IMR:  
176 Infant-mortality rate; U5MR: Under-five mortality rate; PM<sub>2.5</sub>: fine particulate matter with aero  
177 dynamic diameter ≤2.5µm; CO<sub>2</sub>: carbon dioxide emission per capita; PGDP: GDP per capita; T2M:  
178 Temperatures at 2 meters; QV2M: Specific Humidity at 2 Meters.

#### 179 3.2 Spatial and temporal variation of PC

180 The PC, PM<sub>2.5</sub> and CO<sub>2</sub> trends of the whole world, different income groups (high, upper-middle,  
181 lower-middle, and low-income countries) and selected countries are shown in Figure 1. We selected  
182 two countries of the largest population in each income group to represent the corresponding income  
183 group. So we got 8 countries including the United States and Japan to represent the high income group;  
184 China and Brazil to stand for the upper-middle income group; India, Indonesia and Bangladesh,  
185 Nigeria to represent the lower-middle and low income group respectively.

186

187 Globally, the average PC remained almost stable from 2000 to 2016 worldwide. PC in low income

188 group showed an increased tendency while the upper-middle income group's PC decreased. World-  
 189 average PM<sub>2.5</sub> increased with the most increment in lower-middle groups. PM<sub>2.5</sub> in high income  
 190 countries remained the least and kept almost flat. As for the annual average CO<sub>2</sub> emission per capita  
 191 trend, the world average increased by year. The high-income group took the largest part of CO<sub>2</sub>  
 192 emission. However, we could see the decreasing trend of CO<sub>2</sub> in the high-income group. Meanwhile  
 193 the low income group emitted the least and stable CO<sub>2</sub>. CO<sub>2</sub> emission of upper-middle and lower-  
 194 middle income groups increased from 2000 to 2016, too.

195 From 2000 to 2016, PC in Bangladesh decreased significantly (from 193.75  $\mu\text{g}/\text{m}^3$  per tonne to  
 196 106.08  $\mu\text{g}/\text{m}^3$  per tonne) while Nigeria increased (from 112.24  $\mu\text{g}/\text{m}^3$  per tonne to 157.84  $\mu\text{g}/\text{m}^3$   
 197 per tonne). By contrast, PC kept almost stable during the study period in the United States (from 0.53 $\mu\text{g}/\text{m}^3$   
 198 per tonne to 0.46  $\mu\text{g}/\text{m}^3$  per tonne) and Japan (from 1.40  $\mu\text{g}/\text{m}^3$  per tonne to 1.47  $\mu\text{g}/\text{m}^3$  per tonne). The  
 199 similar increasing trend of PM<sub>2.5</sub> concentration could be seen in most selected countries. While the two  
 200 high income countries like the United States (11.3  $\mu\text{g}/\text{m}^3$  in 2000 and 7.6  $\mu\text{g}/\text{m}^3$  in 2016) and Japan  
 201 (13.9  $\mu\text{g}/\text{m}^3$  in both 2000 and 2016) showed decreasing or stable trend. The United States (21.28 and  
 202 16.48 tones per capita in 2000 and 2016) and Japan (9.90 and 9.43 tones per capita in 2000 and 2016)  
 203 are the largest two CO<sub>2</sub> emission countries among the 8 countries while Bangladesh (from 0.21 to 0.52  
 204 tones per capita ) and Nigeria (from 0.62 to 0.55 tones per capita ) the least.

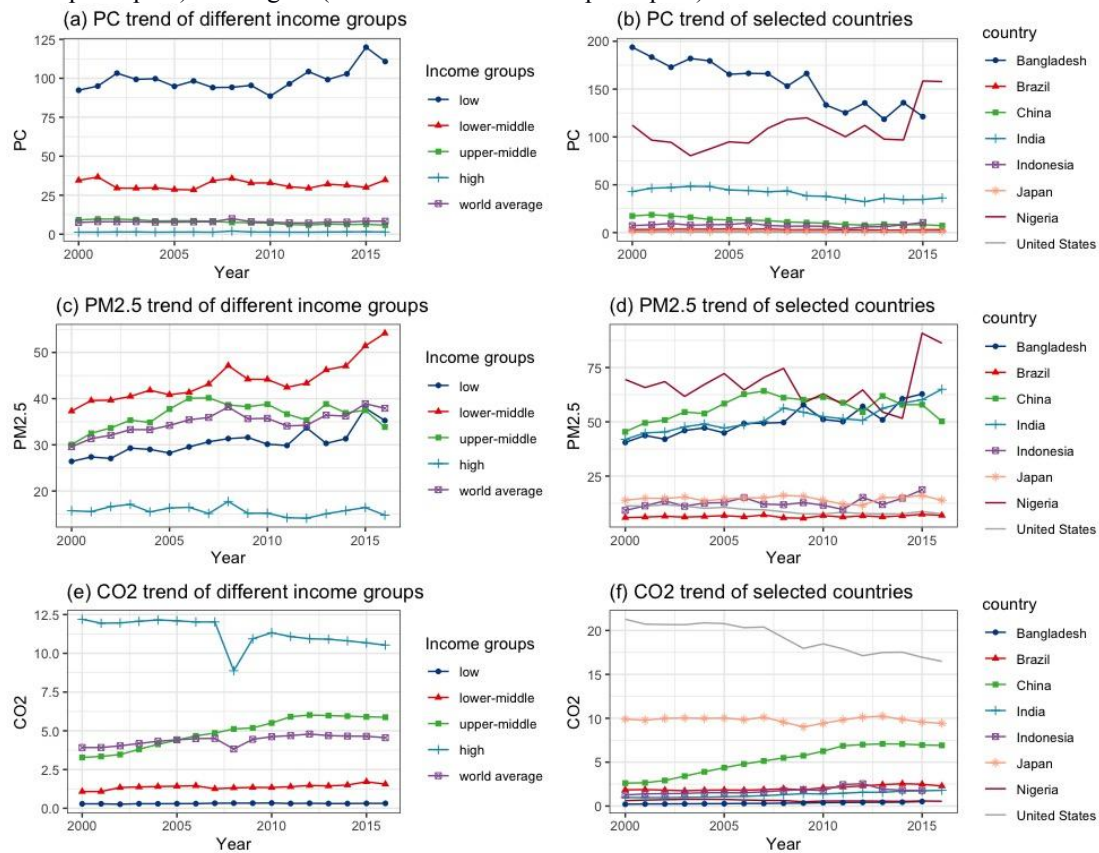

205  
 206 **Figure1. PC trends of the whole world, different income groups and selected countries**

207 **Notes:** PC: PM<sub>2.5</sub> concentration per unit per capita CO<sub>2</sub> emission. We used population-weighted PC,  
 208 PM<sub>2.5</sub> and CO<sub>2</sub> to show time tendencies of different income groups. The units of PC, PM<sub>2.5</sub> and CO<sub>2</sub> are  
 209  $\mu\text{g}/\text{m}^3$  per tonne,  $\mu\text{g}/\text{m}^3$  and tonne respectively.

210  
 211 The spatial distributions of PC during 2000 and 2016 are presented in Figure 2. In 2000, PCs in  
 212 the countries like America, Europe, Australia and most countries in South America were lower than 5  
 213 ( $\mu\text{g}/\text{m}^3$  per tonne). In developing countries like China and India, PCs were higher than 10 ( $\mu\text{g}/\text{m}^3$  per  
 214 tonne) but lower than 50 ( $\mu\text{g}/\text{m}^3$  per tonne). But in poor countries in Africa, most PCs were over 100  
 215 ( $\mu\text{g}/\text{m}^3$  per tonne). Specifically, PCs in Niger, Democratic Republic of Congo were over than 1000  
 216 ( $\mu\text{g}/\text{m}^3$  per tonne) and Chad over 2000 ( $\mu\text{g}/\text{m}^3$  per tonne). In 2016, PC almost showed the same spatial  
 217 distribution globally. PC in China declined to 7.26 ( $\mu\text{g}/\text{m}^3$  per tonne) in 2016. PCs in Chad and Niger  
 218 declined a lot but still over 1000 ( $\mu\text{g}/\text{m}^3$  per tonne). PCs in most countries of the world decreased in the  
 219 past 17 years. The most remarkable decreases were observed for countries in Africa like Chad,

220 Democratic Republic of Congo and Niger, then China and India. Meanwhile, some African countries  
 221 suffered the PC growth, such as Somalia, Eritrea and Nigeria.  
 222

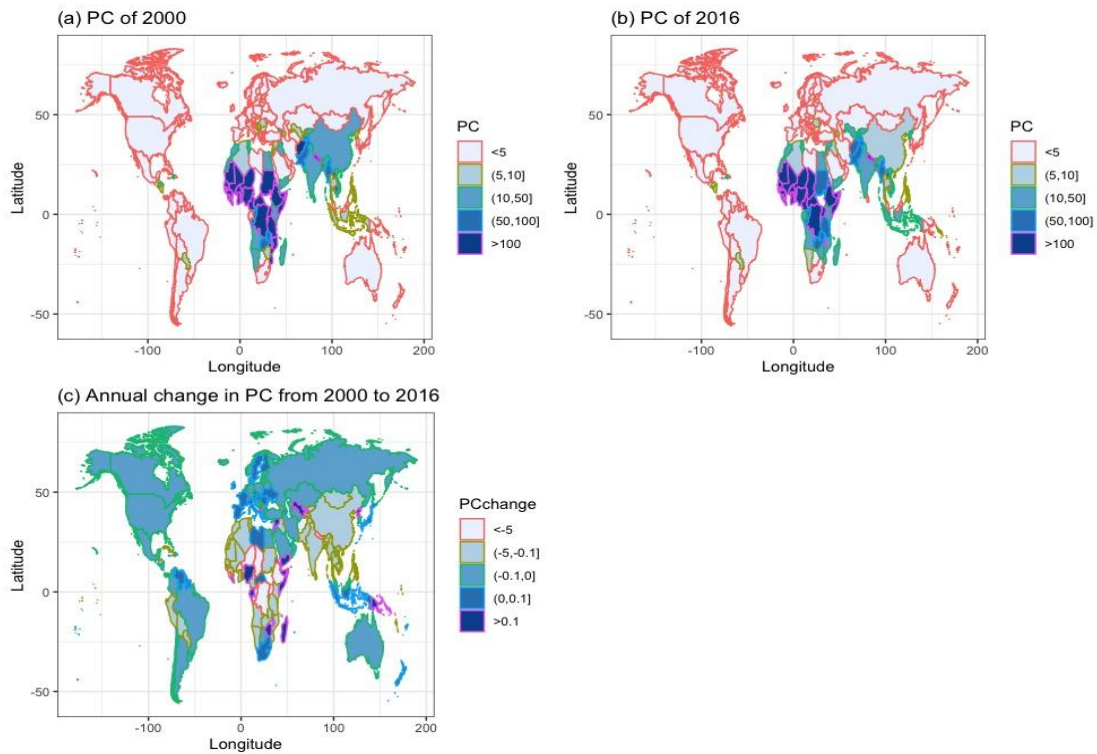

223

224 **Figure 2. Country-level PC and annual average change in PC from 2000 to 2016**

225 **Notes:** PC: PM<sub>2.5</sub> concentration per unit per capita CO<sub>2</sub> emission. The unit of PC is  $\mu\text{g}/\text{m}^3$  per tonne.  
 226

### 227 3.3 The relationship between PC and health metrics

228 The Pearson correlation coefficients between PC and LE, IMR, U5MR and LPGDP were -0.566,  
 229 0.646, 0.659, -0.585 respectively (Table S<sub>2</sub>), and all coefficients were statistically significant at the  
 230 level of 0.001. Using GAMM, we investigated seven models to estimate the relation between PC and  
 231 health (Table S<sub>3</sub>). In model with PC as the only independent variable, the adj.R<sup>2</sup> were 0.320, 0.417 and  
 232 0.435 indicating PC independently explained 32.0%, 41.7% and 43.5% of the variation of LE, IMR and  
 233 U5MR respectively. While in model with PM<sub>2.5</sub> or CO<sub>2</sub> as the only independent variable, PM<sub>2.5</sub> and  
 234 CO<sub>2</sub> could only explain 3.45%, 7.81%, 10.49% and 22.11%, 22.39%, 19.84% of the respective  
 235 variations of LE, IMR and U5MR. Therefore, PC seemed to be a better indicator to reflect health  
 236 compared with PM<sub>2.5</sub> and CO<sub>2</sub>. PGDP single could reflect variation of LE, IMR and U5MR by 58.0%,  
 237 63.6%, 61.3% respectively.

238 We examined the nonlinear associations of PC with LE, IMR, U5MR and LPGDP in Figure 3  
 239 using GAMM. We got the reverse relation curves between PC and LE, LPGDP. Simultaneously, we  
 240 found a positive relation between PC and IMR, U5MR. The non-linear relationships changed  
 241 minimally when we altered the covariates of the model (Figure S<sub>1</sub>).

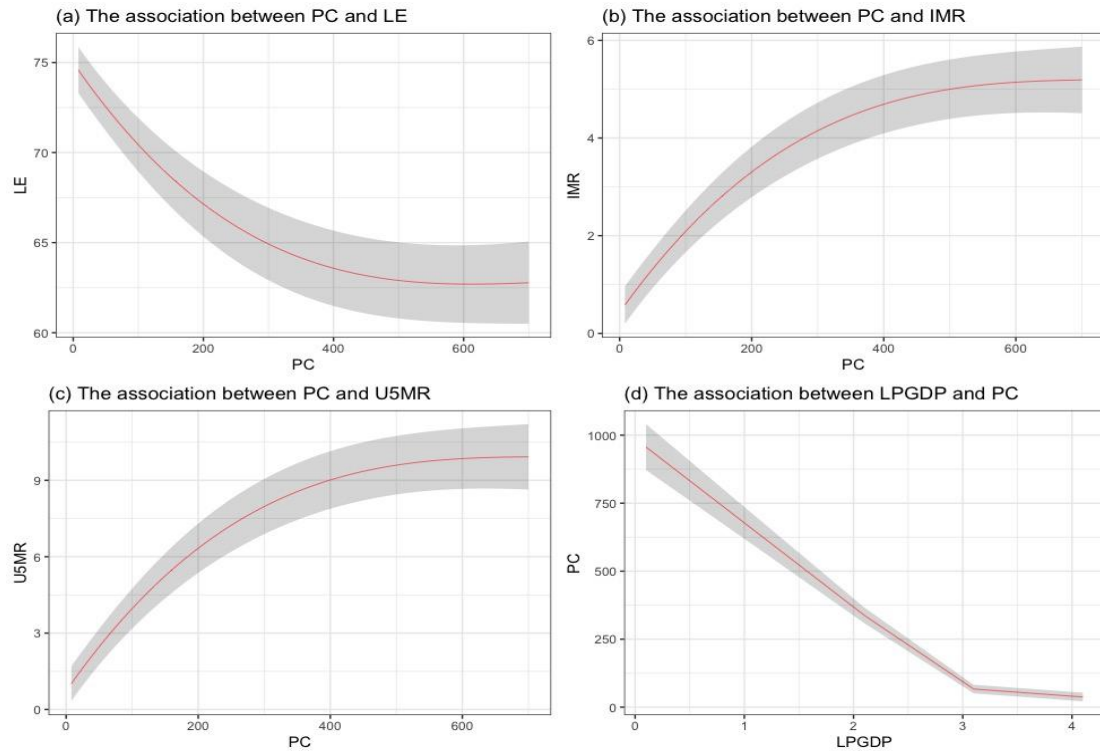

242

243 **Figure 3. The modeled associations of PC with LE, IMR, U5MR and PGDP, by GAMM**

244 **Notes:** Black shadow indicates 95% confidence interval (CI). LE: life expectancy at birth, IMR: Infant-  
 245 mortality rate, U5MR: Under-five mortality rate, PC:  $PM_{2.5}$  concentration per unit per capita  $CO_2$  emission,  
 246 LPGDP: logarithm of GDP per capita. The GAMMs were (a):  $PC+PGDP+T2M+QV2M+PM_{2.5}+CO_2$ ; (b):  
 247  $PC+PGDP+T2M+QV2M+PM_{2.5}+CO_2$ ; (c):  $PC+PGDP+T2M+QV2M+PM_{2.5}+CO_2$ ; (d): LPGDP.  
 248

#### 249 4. Discussion

250 To the best of our knowledge, this is the first paper to evaluate PC as a potential new indicator of  
 251 air quality control efficacy. This indicator almost kept stable over 2000-2016 in the world. There is  
 252 great spatial variation or inequality of PC among countries. On average, PC was high in Africa and low  
 253 in America, Europe and Australia, while Asia was in the middle range during 2000-2016.  
 254

255 Generally, PC is decreasing as the GDP per capita grows. PC is smaller in high income or  
 256 developed countries than in low income or developing countries, possibly because the use of clean-  
 257 polluting production technologies increases with economic development [30]. For high income  
 258 countries, they have the least PC with the highest  $CO_2$  emission but lowest  $PM_{2.5}$  concentration. Both  
 259  $PM_{2.5}$  concentration and  $CO_2$  emission showed decreasing tendency from 2000 to 2016, so there is a  
 260 clear plateau for most high-income countries over the past years. Taking the United States as an  
 261 example, since the 1970s the United States government has input \$25 billion per year to the  
 262 improvement of ambient air quality[31]. Over half of the coal-fired capacity in the United States will  
 263 be equipped with the air pollution control technologies including selective catalytic reduction,  
 264 electrostatic precipitators, sorbent injection and flue gas desulfurization or other scrubber technologies  
 265 by 2020[32].  
 266

267 PC in upper-middle income countries decreased with the increase of  $CO_2$  and relatively slow  
 268 increase of  $PM_{2.5}$ . From 2000 to 2016, the decreasing PC in upper-middle groups might be contributed  
 269 by technological improvement and green production promotion[30]. As the largest population country  
 270 in the world and the largest upper-middle income country, PC in China decreased significantly, from  
 271 17.39 ( $\mu g/m^3$  per tonne) to 7.26 ( $\mu g/m^3$  per tonne). As the largest coal-consuming country in the  
 272 world[12], the Chinese government has implemented many air quality plans such as “Air Pollution  
 273 Prevention and Control Action Plan” [33] and “Reformation and Upgrading Action Plan with ultra-low

emissions (ULE) technologies” focusing on controlling emissions from coal consumption, which have dramatically reduced PM<sub>2.5</sub> emissions from coal-fired power plants [12]. Therefore, PM<sub>2.5</sub> in China remained almost unchanged from 49.5 µg/m<sup>3</sup> in 2000 to 50.2 µg/m<sup>3</sup> in 2016, although CO<sub>2</sub> emission in China increased a lot from 2.61 tones per capita to 6.91 tones per capita.

Lower-middle income countries, most located in South Asia, PC remained almost no change from 2000 to 2016 because of both increment of PM<sub>2.5</sub> and CO<sub>2</sub>. PM<sub>2.5</sub> concentrations in South Asia mainly due to combustion emissions (solid fuels, power plants, agricultural and other open burning, industry and transportation)[34]. Taking India, the largest population country of lower-middle income and one of the highest polluted countries globally as an example [35], the major source of ambient particulate matter pollution is coal burning [36]. Although Indian government has launched several initiatives including improving technologies of coal power plants, energy-intensive industries in the past few years to reduce air pollution [37], which reduced PC in India from 42.85 (µg/m<sup>3</sup> per tonne) to 36.20 (µg/m<sup>3</sup> per tonne), PM<sub>2.5</sub> increased from 44.9 µg/m<sup>3</sup> to 65 µg/m<sup>3</sup> with CO<sub>2</sub> increased from 0.98 tones per capita to 1.80 tones per capita during 2000 and 2016.

Low income countries are just on the contrary to the high income ones, which had the highest PM<sub>2.5</sub> concentration but lowest CO<sub>2</sub> emission. PM<sub>2.5</sub> increased while CO<sub>2</sub> almost unchanged during 2000 to 2016, causing PC increased. The three largest PC located in the three African countries of Chad, Niger and the Democratic Republic of Congo. It is needed to mention that air pollution in Africa, such as countries in north (Niger, Egypt and Mauritania) and west (Cameroon, Nigeria and Burkina Faso) Africa and the Middle East (Saudi Arabia, Qatar and Kuwait), PM<sub>2.5</sub> is typically composed of aeolian dust and vegetation fires[38,39]. Besides, 26% of 51 million people relied on biomass fuel, gas and paraffin for cooking and 41.2% for heating in the 2011 South African Census report, which will also cause the air pollution[40]. In South Africa, some policies have been promulgated such as the National Environmental Management Air Quality Act (2004) which defined the Minimum Emissions Standards for regulating gaseous and particulate emissions from industrial operations. In 2009, South Africa pledged a target of CO<sub>2</sub> emissions reductions also reduced PM<sub>2.5</sub> by switching away from an fossil fuels based economy[41]. PC in Chad decreased from 2286.39 µg/m<sup>3</sup> per tonne in 2000 to 1163.79 µg/m<sup>3</sup> per tonne in 2016 and Niger from 1496.35 µg/m<sup>3</sup> per tonne to 1029.71 µg/m<sup>3</sup> per tonne. But the PC reduction mainly depend on the increment of PM<sub>2.5</sub> (from 48.2 µg/m<sup>3</sup> to 58.7 µg/m<sup>3</sup> in Chad and 91.3 µg/m<sup>3</sup> to 111.3 µg/m<sup>3</sup> in Niger) and more fast increasing speed of CO<sub>2</sub> (from 0.02 tones per capita to 0.05 tones per capita, from 0.06 tones per capita to 0.11 tones per capita respectively). However, it is needed to mention that some African countries suffered the PC growth, such as Somalia, Eritrea and Nigeria. There is still a long way to go for low income countries to improve the air pollution control efficiency as part of development of economy.

PC might be a good indicator of health. PM<sub>2.5</sub> attributed mortality of childhood in sub-Saharan Africa (such as Chad, Sudan, and Nigeria) and south Asia (such as India and Pakistan) contributes substantially to the global YLLs (Years of life lost) from ambient air pollution[38,39]. Meanwhile, most largest PC located in the above two areas. It was estimated that highest rate of childhood mortality due to air pollution especially PM<sub>2.5</sub> was in Chad (located in sub-Saharan Africa) with the largest PC in the world (mean of PC from 2000 to 2016 was 1333.10 µg/m<sup>3</sup> per tonne)[41]. In Chad, YLLs per capita due to exposure to PM<sub>2.5</sub> in children younger than 5 years are 1000 times higher than in the United States (mean of PC from 2000 to 2016 was 0.48 µg/m<sup>3</sup> per tonne)[39]. Meanwhile, PC might be a better indicator for monitoring national progress of addressing air pollution related health burden than PM<sub>2.5</sub>[2,42] or CO<sub>2</sub> for the better explaining variation of LE, IMR and U5MR.

Compared with previous literature about association between PM<sub>2.5</sub>, CO<sub>2</sub> and health[4,7], our paper suggests that more attention should also be paid to the air quality control efficacy, in order to realize climate, air quality and health co-benefits. The air pollution control efficiency could be improved through change of energy structure (e.g., shift to cleaner energy) and technology innovations (e.g., electric vehicle) [43,44]. We found that the association between PC and health metrics was independent of GDP per capita. This suggests that clean air brought by reducing PC might generate health improvements independent of economic growth. This result also suggest that the global health



329 inequity is not merely explained by income inequality, but also by the inequality in the ability to  
330 control ambient air pollution.

331

332 Our findings contribute to the area of air pollution, climate change and human health. Firstly, it is  
333 useful for policymakers to pay more attention to air pollution control efficacy when dealing with  
334 climate change by reducing carbon emission. Secondly, PC provides a new angle to understand the  
335 global health equity. The low health levels of low income countries might be partly because of the low  
336 efficacy to reduce the harm from ambient air pollution [37]. Thus for low income countries, the  
337 promotion of air pollution control efficacy should be included as an important part of economic  
338 development. Also, assistance from developed countries to undeveloped ones should include not only  
339 improving the economy but also technologies related to air pollution control efficacy. These suggest  
340 that we could improve health equity more effectively by paying more attention to air pollution control  
341 efficiency.

342

343 The study has some limitations. Firstly, we did not obtain data from every country in the world  
344 like other global analysis[26]. Our study did not cover the Greenland, Antarctica and some Middle  
345 Africa because of the missing data. But as few people live in these areas, we could provide a reference  
346 for the majority of population in the world [26]. Secondly, due to data unavailability, we did not  
347 include data on factors that might contribute to PC such as energy structure and technologies of  
348 processing air pollution emissions. Future studies with relevant data could give a detailed evaluation on  
349 these contributing factors. There are some weaknesses of the PC index. Firstly, it couldn't reflect the  
350 air pollution caused by the natural sources of aeolian dust and vegetation fires from the unpaved roads  
351 or deserts. Secondly, PC maybe not change while some improvements both happens in air pollution  
352 control and reducing CO<sub>2</sub> per capita. That is why PC in high income countries keep stable from 2000 to  
353 2016 as decrease happened in both PM<sub>2.5</sub> concentration and CO<sub>2</sub> emission. Thirdly, in theory PC would  
354 reduce if CO<sub>2</sub> emission increases without impacting on ground level PM<sub>2.5</sub> exposure within country.  
355 This is clearly not a good outcome to climate change and health. Anyway, PC is really a good indicator  
356 to reflect air pollution control efficiency because it reduces with changing the energy structure from  
357 coal to clean energy[33,35], improving air cleaning technology[10]. There are many ways to develop  
358 the PC indicator in the next stages. Other detailed covariates needed to be included like fossil fuel  
359 combustion emission control technology, unusual events like bushfire, natural sources and social  
360 disruptions.

## 361 **5. Conclusions**

362 In summary, our study developed a novel air pollution control efficacy indicator, ground level  
363 PM<sub>2.5</sub> concentration per unit CO<sub>2</sub> emission per capita (PC), to assess population air pollution exposure  
364 level related to carbon emission. The results indicated that PC has kept almost stable from 2000 to  
365 2016 globally with the low income groups increased. PC is geographically different and getting lower  
366 with the economic development. PC is statistically associated with LE, IMR and U5MR, which  
367 provides a new way to promote global health equity from the angle air pollution control efficacy.

368

## 369 **Acknowledgements**

370 Some data were obtained from the NASA Langley Research Center POWER Project funded  
371 through the NASA Earth Science Directorate Applied Science Program. CH was supported by  
372 Shandong provincial department of education funded projects for overseas study; SL was supported by  
373 an Early Career Fellowship of the Australian National Health and Medical Research Council (number  
374 APP1109193); and YG was supported by Career Development Fellowships of the Australian National  
375 Health and Medical Research Council (numbers APP1163693).

## 376 **Data Availability Statement**

377 The data that support the findings of this study are available upon request from the authors.

## 378 **Declaration of competing interests**

379 The authors declare they have no actual or potential competing financial interests.

## 380 Funding

381 This study was supported by Taishan Scholar Program.

## 382 References

- 383 [1] Ding, D., Xing, J., Wang, S., Liu, K. and Hao, J., 2019. Estimated contributions of emissions controls,  
384 meteorological factors, population growth, and changes in baseline mortality to reductions in ambient PM 2.5 and  
385 PM 2.5-related mortality in China, 2013–2017. *Environmental health perspectives*, 127(6), p.067009.
- 386 [2] Ouyang, W., Gao, B., Cheng, H., Hao, Z. and Wu, N., 2018. Exposure inequality assessment for PM2. 5 and  
387 the potential association with environmental health in Beijing. *Science of the Total Environment*, 635, pp.769-778.
- 388 [3] Perera, F., 2018. Pollution from fossil-fuel combustion is the leading environmental threat to global pediatric  
389 health and equity: Solutions exist. *International journal of environmental research and public health*, 15(1), p.16.
- 390 [4] Dong, F., Yu, B. and Pan, Y., 2019. Examining the synergistic effect of CO2 emissions on PM2. 5 emissions  
391 reduction: Evidence from China. *Journal of cleaner production*, 223, pp.759-771.
- 392 [5] West, J.J., Smith, S.J., Silva, R.A., Naik, V., Zhang, Y. and Adelman, Z., Co-benefits of global greenhouse gas  
393 mitigation for future air quality and human health. *Nat Clim Change*. 2013; 3: 885–9.
- 394 [6] Li, Z., Shao, S., Shi, X., Sun, Y. and Zhang, X., 2019. Structural transformation of manufacturing, natural  
395 resource dependence, and carbon emissions reduction: Evidence of a threshold effect from China. *Journal of*  
396 *cleaner production*, 206, pp.920-927.
- 397 [7] Anenberg, S.C., Achakulwisut, P., Brauer, M., Moran, D., Apte, J.S. and Henze, D.K., 2019. Particulate  
398 matter-attributable mortality and relationships with carbon dioxide in 250 urban areas worldwide. *Scientific*  
399 *reports*, 9(1), pp.1-6.
- 400 [8] Mao, X., Zhou, J. and Corsetti, G., 2014. How well have China's recent five-year plans been implemented for  
401 energy conservation and air pollution control?. *Environmental science & technology*, 48(17), pp.10036-10044.
- 402 [9] Lelieveld, J., Evans, J.S., Fnais, M., Giannadaki, D. and Pozzer, A., 2015. The contribution of outdoor air  
403 pollution sources to premature mortality on a global scale. *Nature*, 525(7569), pp.367-371.
- 404 [10] He, C. and Wang, Z.L., 2018. Triboelectric nanogenerator as a new technology for effective PM2. 5 removing  
405 with zero ozone emission. *Progress in Natural Science: Materials International*, 28(2), pp.99-112.
- 406 [11] West, J.J., et al., 2016. "What We Breathe Impacts Our Health: Improving Understanding of the Link between  
407 Air Pollution and Health". *Environ Sci Technol*, 50(10): p. 4895-904.
- 408 [12] Liu, X., Liu, Z., Jiao, W., Li, X., Lin, J. and Ku, A., 2017. Impact of "ultra low emission" technology of coal-  
409 fired power on PM 2.5 pollution in the Jing-Jin-Ji Region. *Frontiers in Energy*, pp.1-5.
- 410 [13] Cao, J., Pui, D.Y., Kuehn, T.T., Tie, X., Ramachandran, G., Zhu, T., Wang, J. and Tao, W., 2014. 1st UMN-  
411 CAS Bilateral Seminar on PM2. 5 science, health effects and control technology Xi'an, China, May 27-28,  
412 2014. *Particuology*, 16, pp.227-229.
- 413 [14] Fong, H. and E. Harris, 2015. Technology, innovation and health equity. *Bull World Health Organ*, 93(7): p.  
414 438-438A.
- 415 [15] Scovronick, N., Budolfson, M., Dennig, F., Errickson, F., Fleurbaey, M., Peng, W., Socolow, R.H., Spears, D.  
416 and Wagner, F., 2019. The impact of human health co-benefits on evaluations of global climate policy. *Nature*  
417 *communications*, 10(1), pp.1-12.
- 418 [16] Renzi, M., Forastiere, F., Schwartz, J., Davoli, M., Michelozzi, P. and Stafoggia, M., 2019. Long-Term PM  
419 10 Exposure and Cause-Specific Mortality in the Latium Region (Italy): A Difference-in-Differences  
420 Approach. *Environmental health perspectives*, 127(6), p.067004.
- 421 [17] Brauer, M., Freedman, G., Frostad, J., Van Donkelaar, A., Martin, R.V., Dentener, F., Dingenen, R.V., Estep,  
422 K., Amini, H., Apte, J.S. and Balakrishnan, K., 2016. Ambient air pollution exposure estimation for the global  
423 burden of disease 2013. *Environmental science & technology*, 50(1), pp.79-88.
- 424 [18] Yoon, C., Lee, K. and Park, D., 2011. Indoor air quality differences between urban and rural preschools in  
425 Korea. *Environmental Science and Pollution Research*, 18(3), pp.333-345.
- 426 [19] Karimi, B., 2020. Air pollution and mortality among infant and children under five years: a systematic review  
427 and meta-analysis. *Atmospheric Pollution Research*.
- 428 [20] Armstrong, B., Sera, F., Vicedo-Cabrera, A.M., Abruzy, R., Åström, D.O., Bell, M.L., Chen, B.Y., de Sousa  
429 Zanotti Stagliorio Coelho, M., Correa, P.M., Dang, T.N. and Diaz, M.H., 2019. The Role of Humidity in  
430 Associations of High Temperature with Mortality: A Multicountry, Multicity Study. *Environmental health*  
431 *perspectives*, 127(9), p.097007.
- 432 [21] Jung, C.R., Hwang, B.F. and Chen, W.T., 2018. Incorporating long-term satellite-based aerosol optical depth,  
433 localized land use data, and meteorological variables to estimate ground-level PM2. 5 concentrations in Taiwan  
434 from 2005 to 2015. *Environmental pollution*, 237, pp.1000-1010.
- 435 [22] Owili, P.O., Lien, W.H., Muga, M.A. and Lin, T.H., 2017. The associations between types of ambient PM2. 5  
436 and under-five and maternal mortality in Africa. *International journal of environmental research and public*  
437 *health*, 14(4), p.359.

438 [23] Chen, Z.Y., Zhang, T.H., Zhang, R., Zhu, Z.M., Ou, C.Q. and Guo, Y., 2018. Estimating PM<sub>2.5</sub>  
439 concentrations based on non-linear exposure-lag-response associations with aerosol optical depth and  
440 meteorological measures. *Atmospheric Environment*, 173, pp.30-37.

441 [24] Sorek-Hamer, M., Strawa, A.W., Chatfield, R.B., Esswein, R., Cohen, A. and Broday, D.M., 2013. Improved  
442 retrieval of PM<sub>2.5</sub> from satellite data products using non-linear methods. *Environmental pollution*, 182, pp.417-  
443 423.

444 [25] Yang, J., Ou, C.Q., Ding, Y., Zhou, Y.X. and Chen, P.Y., 2012. Daily temperature and mortality: a study of  
445 distributed lag non-linear effect and effect modification in Guangzhou. *Environmental Health*, 11(1), p.63.

446 [26] Yin, Q., Wang, J., Ren, Z., Li, J. and Guo, Y., 2019. Mapping the increased minimum mortality temperatures  
447 in the context of global climate change. *Nature communications*, 10(1), pp.1-8.

448 [27] Gasparini, A., Guo, Y., Hashizume, M., Lavigne, E., Zanobetti, A., Schwartz, J., Tobias, A., Tong, S.,  
449 Rocklöv, J., Forsberg, B. and Leone, M., 2015. Mortality risk attributable to high and low ambient temperature: a  
450 multicountry observational study. *The Lancet*, 386(9991), pp.369-375.

451 [28] Li, T., Horton, R.M. and Kinney, P.L., 2013. Projections of seasonal patterns in temperature-related deaths for  
452 Manhattan, New York. *Nature Climate Change*, 3(8), pp.717-721.

453 [29] World Bank Data Team. New country classifications by income level: 2017-2018. July 1, 2017.  
454 (<https://blogs.worldbank.org/opendata/new-country-classifications-income-level-2017-2018>) (Accessed: 12  
455 May, 2020)

456 [30] Ji, X., Yao, Y. and Long, X., 2018. What causes PM<sub>2.5</sub> pollution? Cross-economy empirical analysis from  
457 socioeconomic perspective. *Energy Policy*, 119, pp.458-472.

458 [31] Correia, A.W., Pope III, C.A., Dockery, D.W., Wang, Y., Ezzati, M. and Dominici, F., 2013. The effect of air  
459 pollution control on life expectancy in the United States: an analysis of 545 US counties for the period 2000 to  
460 2007. *Epidemiology (Cambridge, Mass.)*, 24(1), p.23.

461 [32] Thorneloe, S.A., Kosson, D.S., Sanchez, F., Garrabrants, A.C. and Helms, G., 2010. Evaluating the fate of  
462 metals in air pollution control residues from coal-fired power plants.

463 [33] Cai, S., Wang, Y., Zhao, B., Wang, S., Chang, X. and Hao, J., 2017. The impact of the “air pollution  
464 prevention and control action plan” on PM<sub>2.5</sub> concentrations in Jing-Jin-Ji region during 2012–2020. *Science of  
465 the Total Environment*, 580, pp.197-209.

466 [34] Shaddick, G., Thomas, M.L., Amini, H., Broday, D., Cohen, A., Frostad, J., Green, A., Gumy, S., Liu, Y.,  
467 Martin, R.V. and Pruss-Ustun, A., 2018. Data integration for the assessment of population exposure to ambient air  
468 pollution for global burden of disease assessment. *Environmental science & technology*, 52(16), pp.9069-9078.

469 [35] Cohen, A.J., Brauer, M., Burnett, R., Anderson, H.R., Frostad, J., Estep, K., Balakrishnan, K., Brunekreef, B.,  
470 Dandona, L., Dandona, R. and Feigin, V., 2017. Estimates and 25-year trends of the global burden of disease  
471 attributable to ambient air pollution: an analysis of data from the Global Burden of Diseases Study 2015. *The  
472 Lancet*, 389(10082), pp.1907-1918.

473 [36] Upadhyay, A., Dey, S., Chowdhury, S. and Goyal, P., 2018. Expected health benefits from mitigation of  
474 emissions from major anthropogenic PM<sub>2.5</sub> sources in India: Statistics at state level. *Environmental  
475 Pollution*, 242, pp.1817-1826.

476 [37] Balakrishnan, K., Dey, S., Gupta, T., Dhaliwal, R.S., Brauer, M., Cohen, A.J., Stanaway, J.D., Beig, G., Joshi,  
477 T.K., Aggarwal, A.N. and Sabde, Y., 2019. The impact of air pollution on deaths, disease burden, and life  
478 expectancy across the states of India: the Global Burden of Disease Study 2017. *The Lancet Planetary Health*, 3(1),  
479 pp.e26-e39.

480 [38] Krotkov, N.A., McLinden, C.A., Li, C., Lamsal, L.N., Celarier, E.A., Marchenko, S.V., Swartz, W.H.,  
481 Bucsela, E.J., Joiner, J., Duncan, B.N. and Boersma, K.F., 2015. Aura OMI observations of regional SO<sub>2</sub> and NO<sub>2</sub>  
482 pollution changes from 2005 to 2014. *Atmospheric Chemistry & Physics Discussions*, 15(19).

483 [39] Lelieveld, J., Haines, A. and Pozzer, A., 2018. Age-dependent health risk from ambient air pollution: a  
484 modelling and data analysis of childhood mortality in middle-income and low-income countries. *The lancet  
485 Planetary health*, 2(7), pp.e292-e300.

486 [40] Shirinde, J., Wichmann, J. and Voyi, K., 2014. Association between wheeze and selected air pollution sources  
487 in an air pollution priority area in South Africa: a cross-sectional study. *Environmental Health*, 13(1), p.32.

488 [41] Henneman, L.R., Rafaj, P., Annegarn, H.J. and Klausbrückner, C., 2016. Assessing emissions levels and costs  
489 associated with climate and air pollution policies in South Africa. *Energy Policy*, 89, pp.160-170.

490 [42] Song, C., He, J., Wu, L., Jin, T., Chen, X., Li, R., Ren, P., Zhang, L. and Mao, H., 2017. Health burden  
491 attributable to ambient PM<sub>2.5</sub> in China. *Environmental pollution*, 223, pp.575-586.

492 [43] Zhang, Z., Shao, C., Guan, Y. and Xue, C., 2019. Socioeconomic factors and regional differences of PM<sub>2.5</sub>  
493 health risks in China. *Journal of environmental management*, 251, p.109564.

494 [44] Soubbotina, T.P., 2004. *Beyond economic growth: An introduction to sustainable development*. The World  
495 Bank.

496

(a) PC trend of different income groups

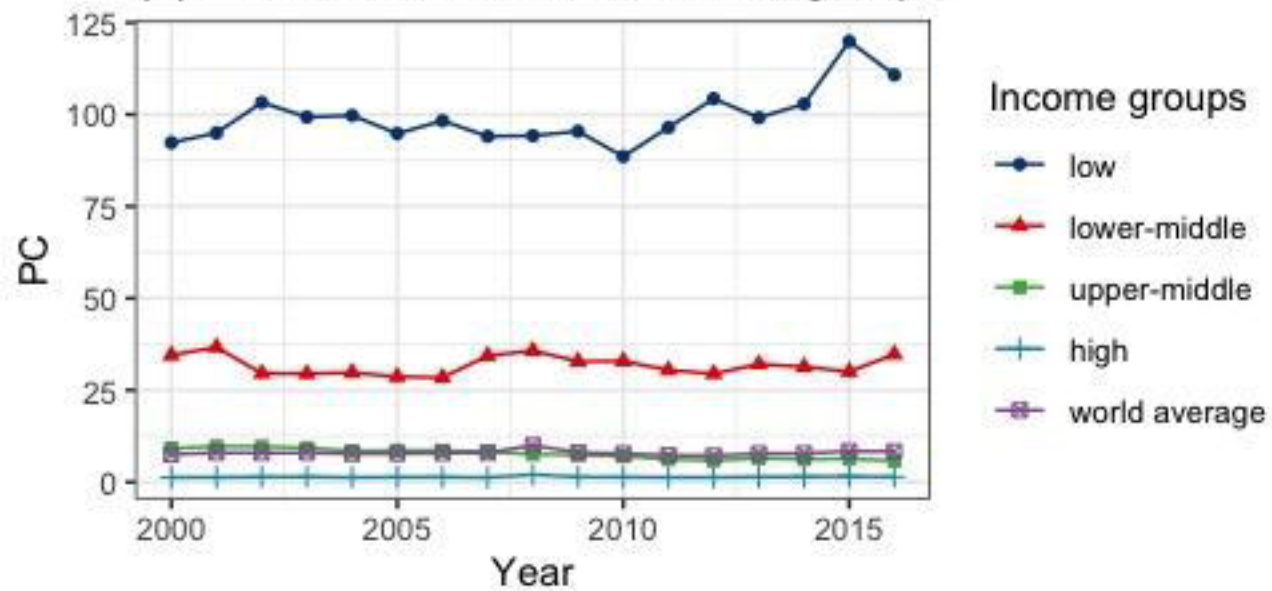

(b) PC trend of selected countries

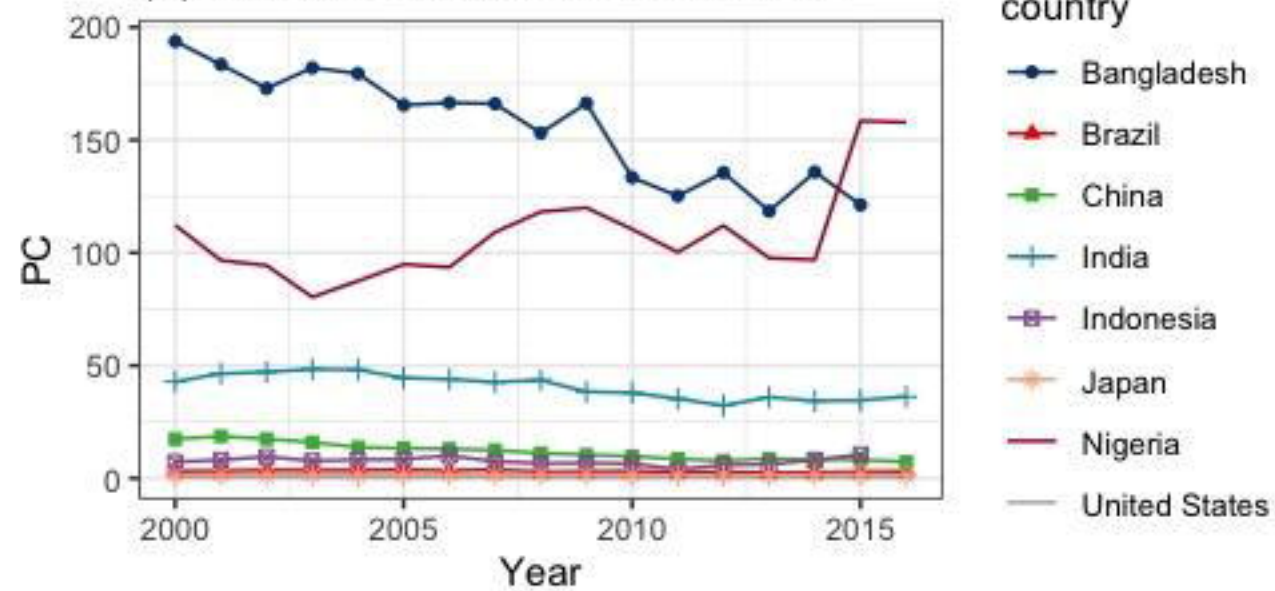

(c) PM2.5 trend of different income groups

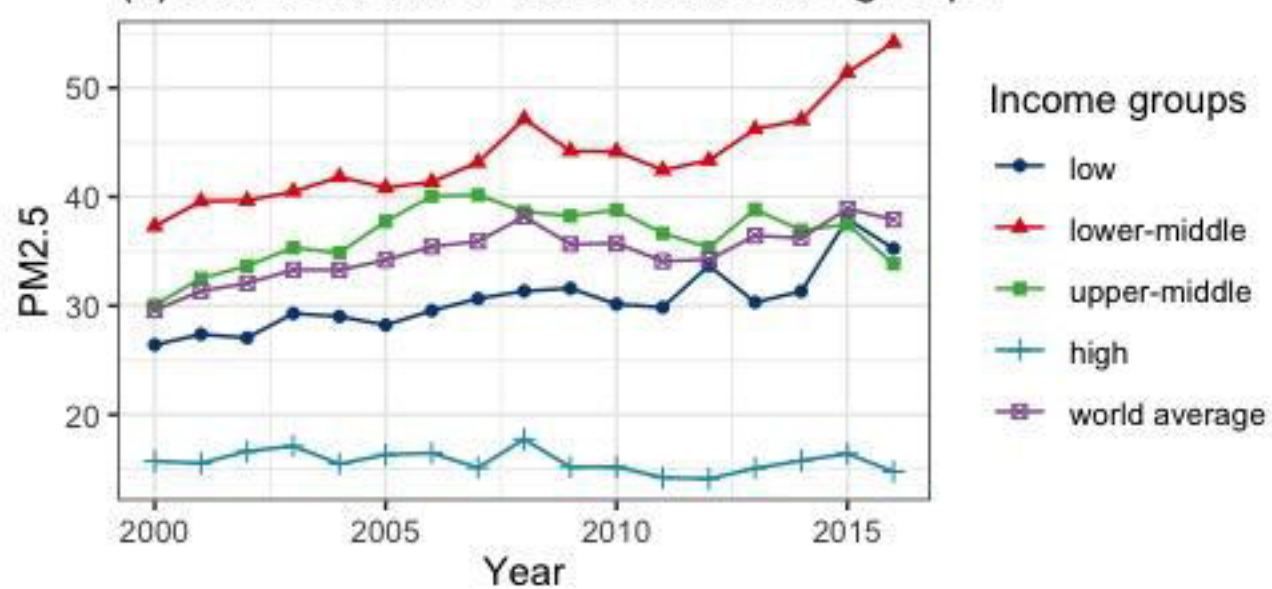

(d) PM2.5 trend of selected countries

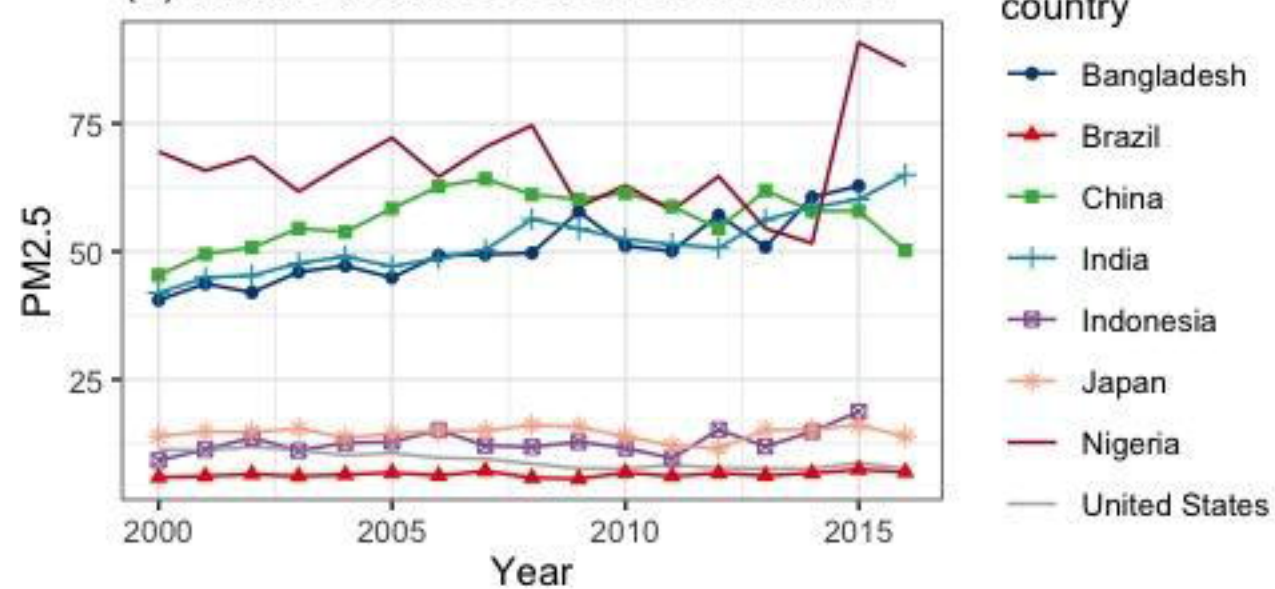

(e) CO2 trend of different income groups

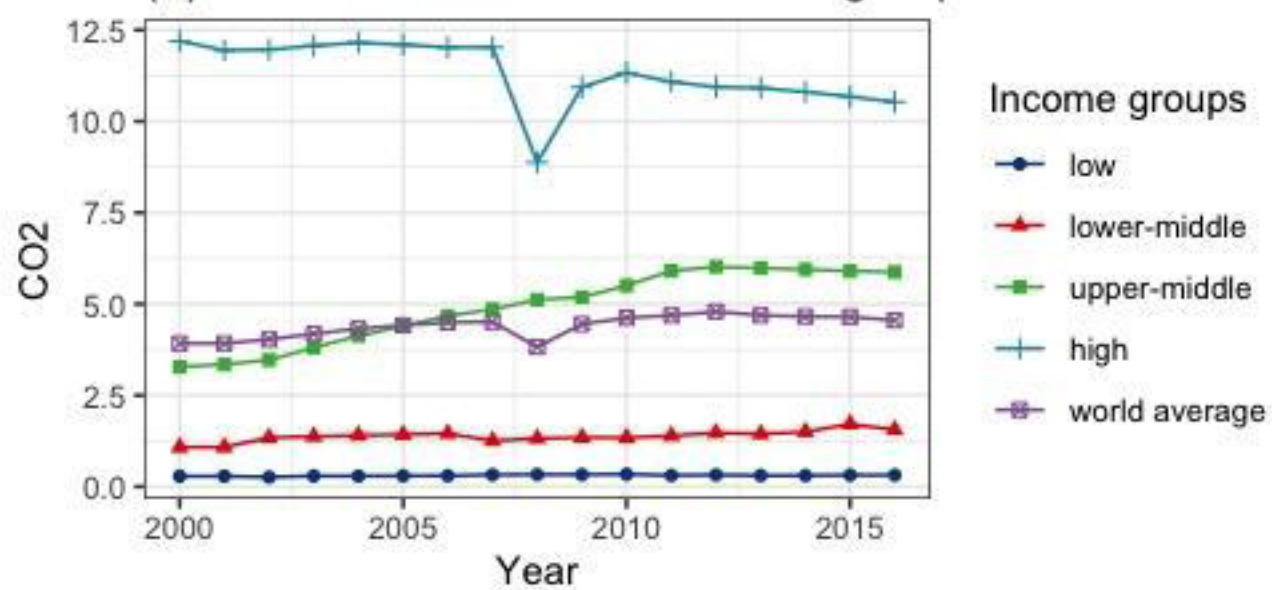

(f) CO2 trend of selected countries

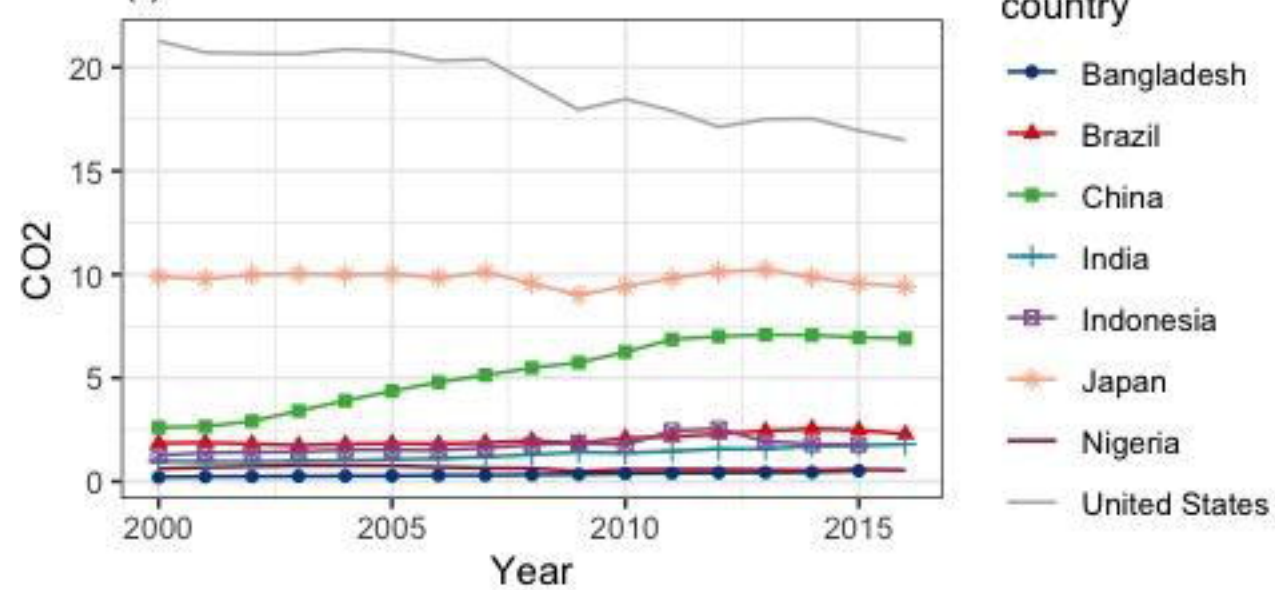

(a) PC of 2000

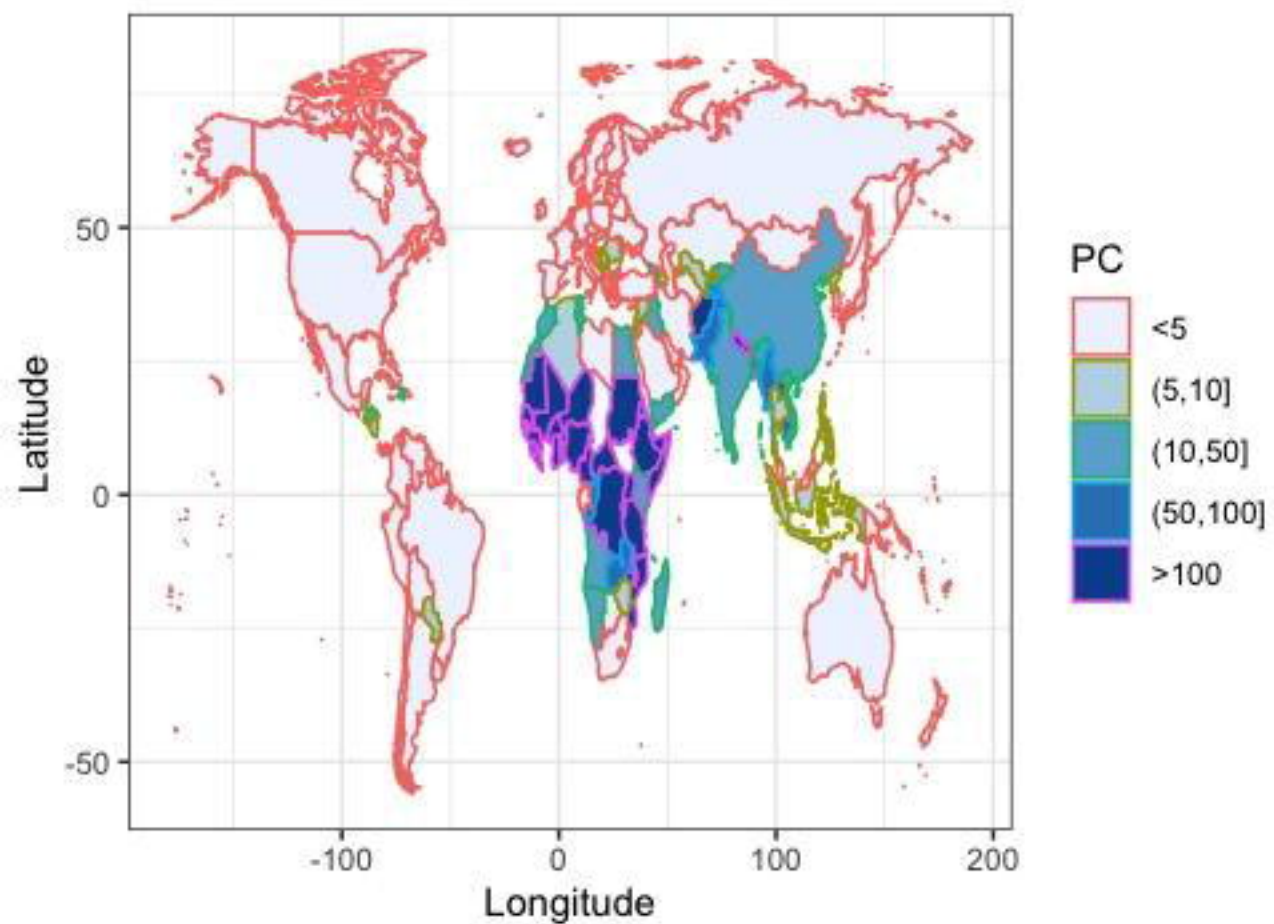

(b) PC of 2016

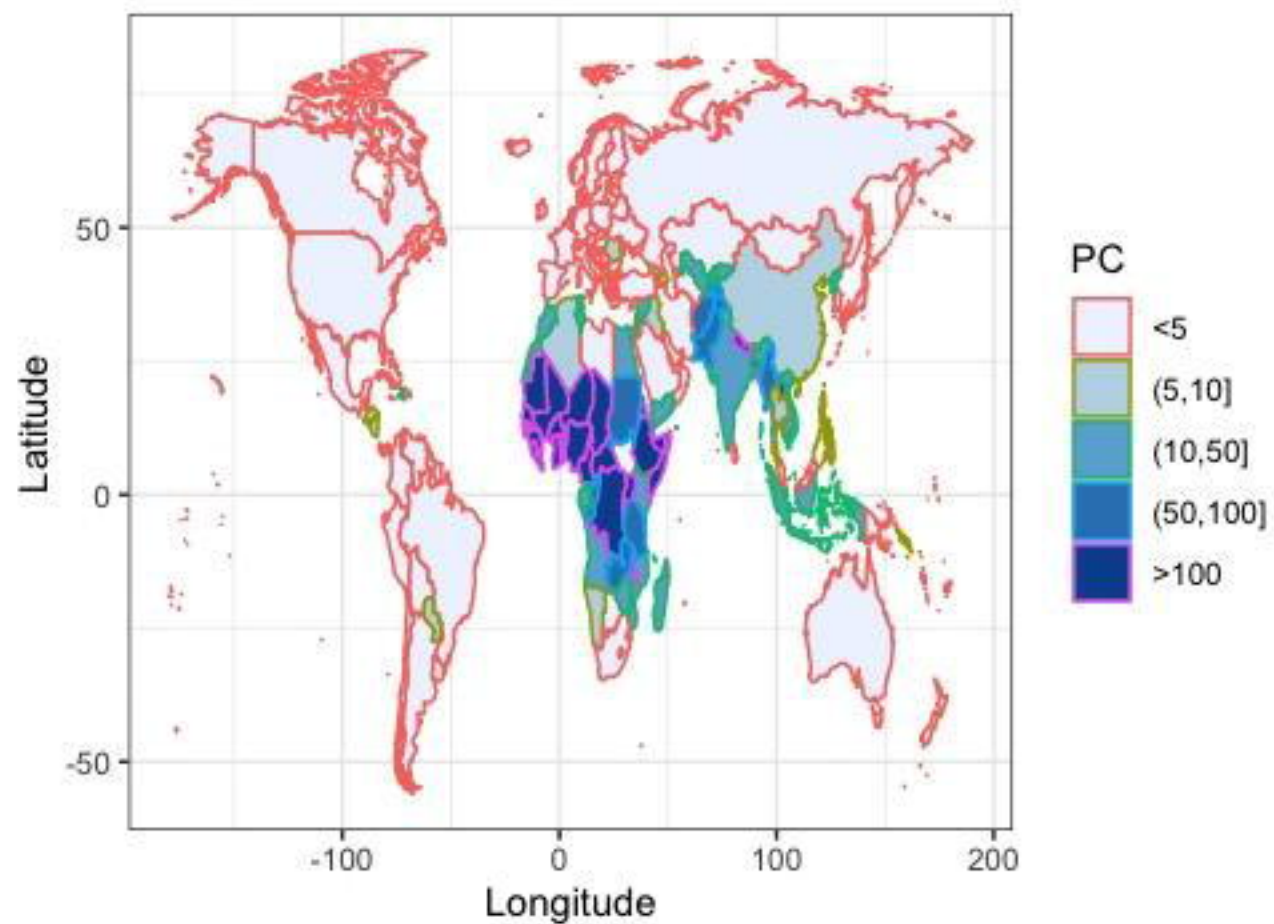

(c) Annual change in PC from 2000 to 2016

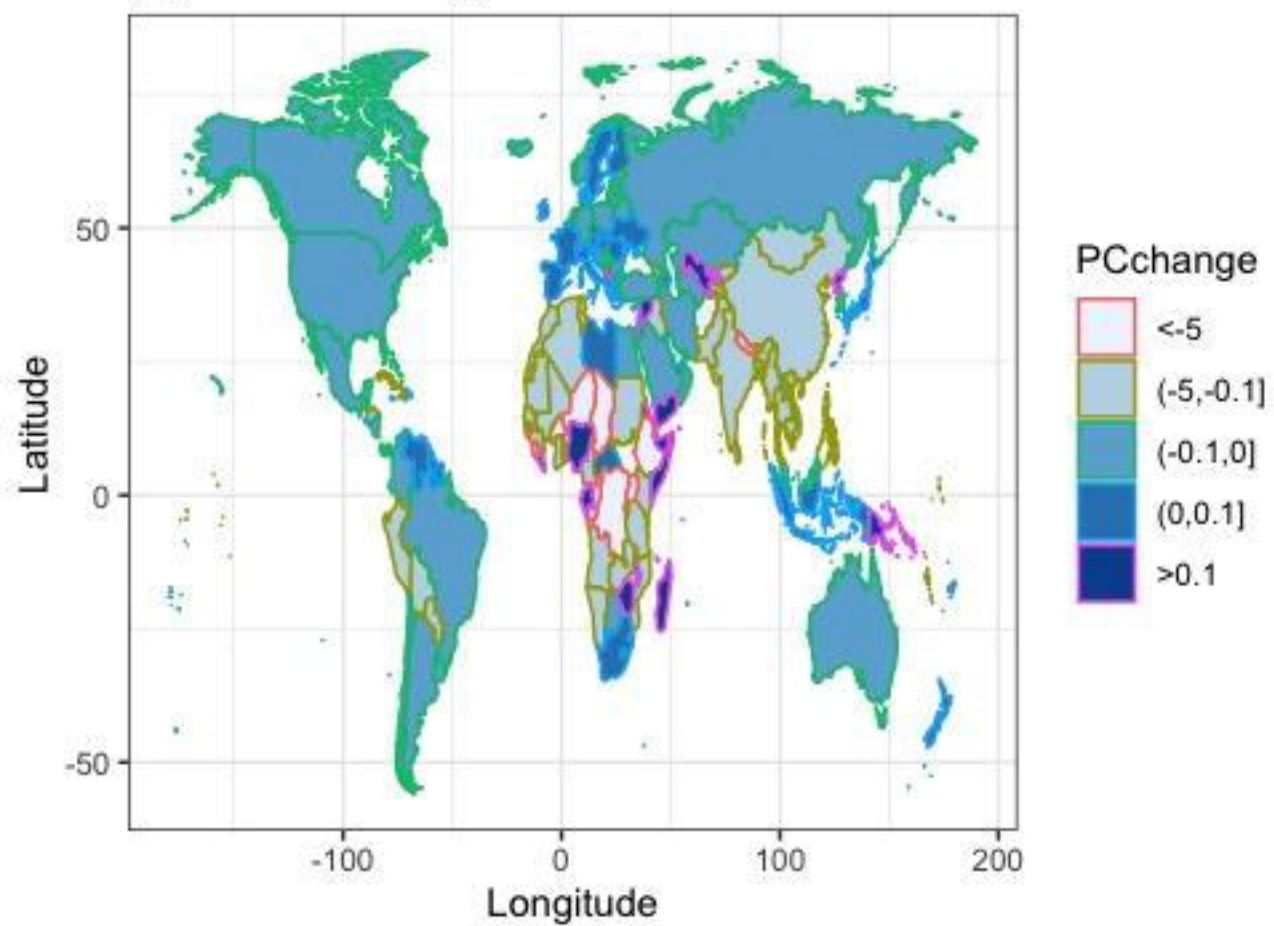

(a) The association between PC and LE

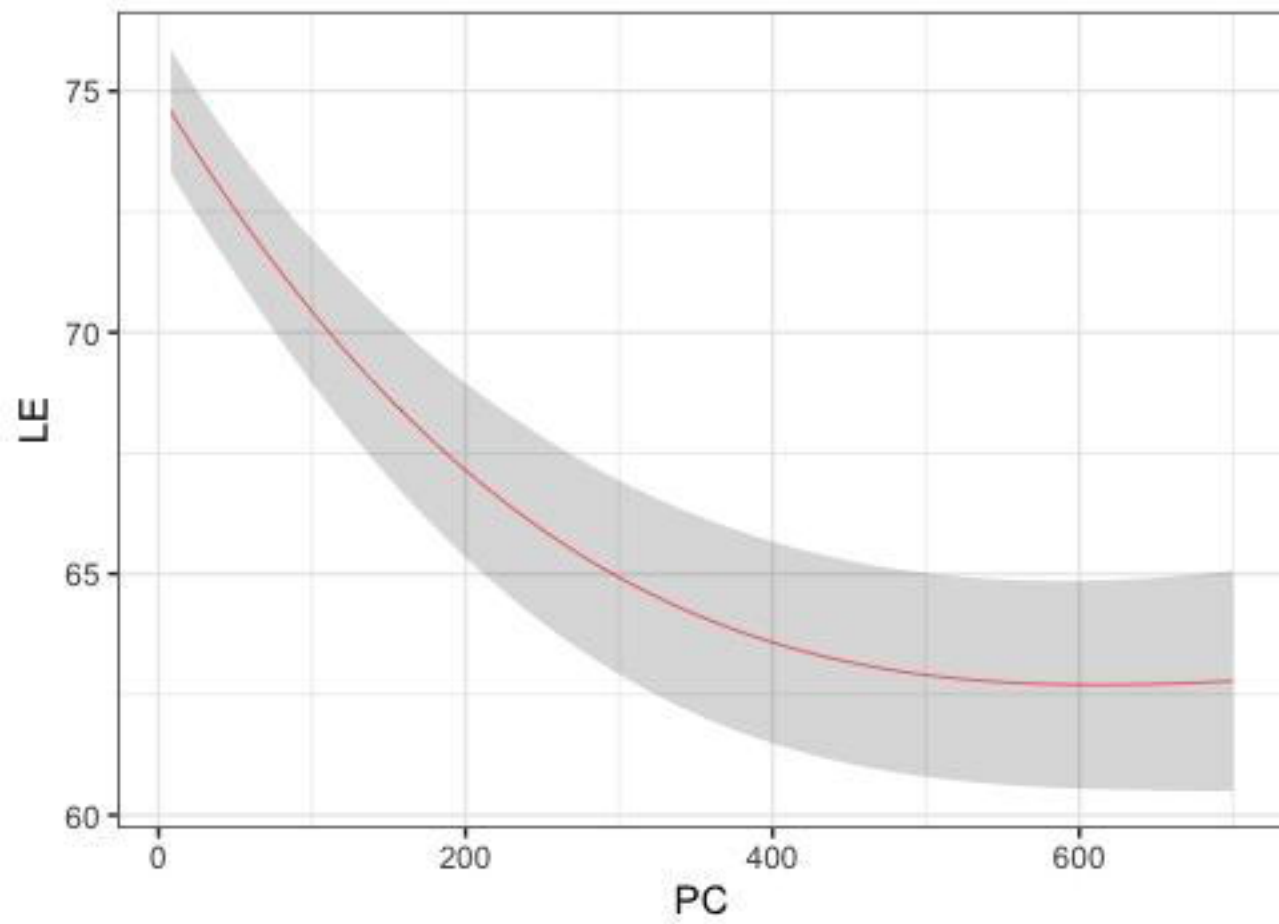

(b) The association between PC and IMR

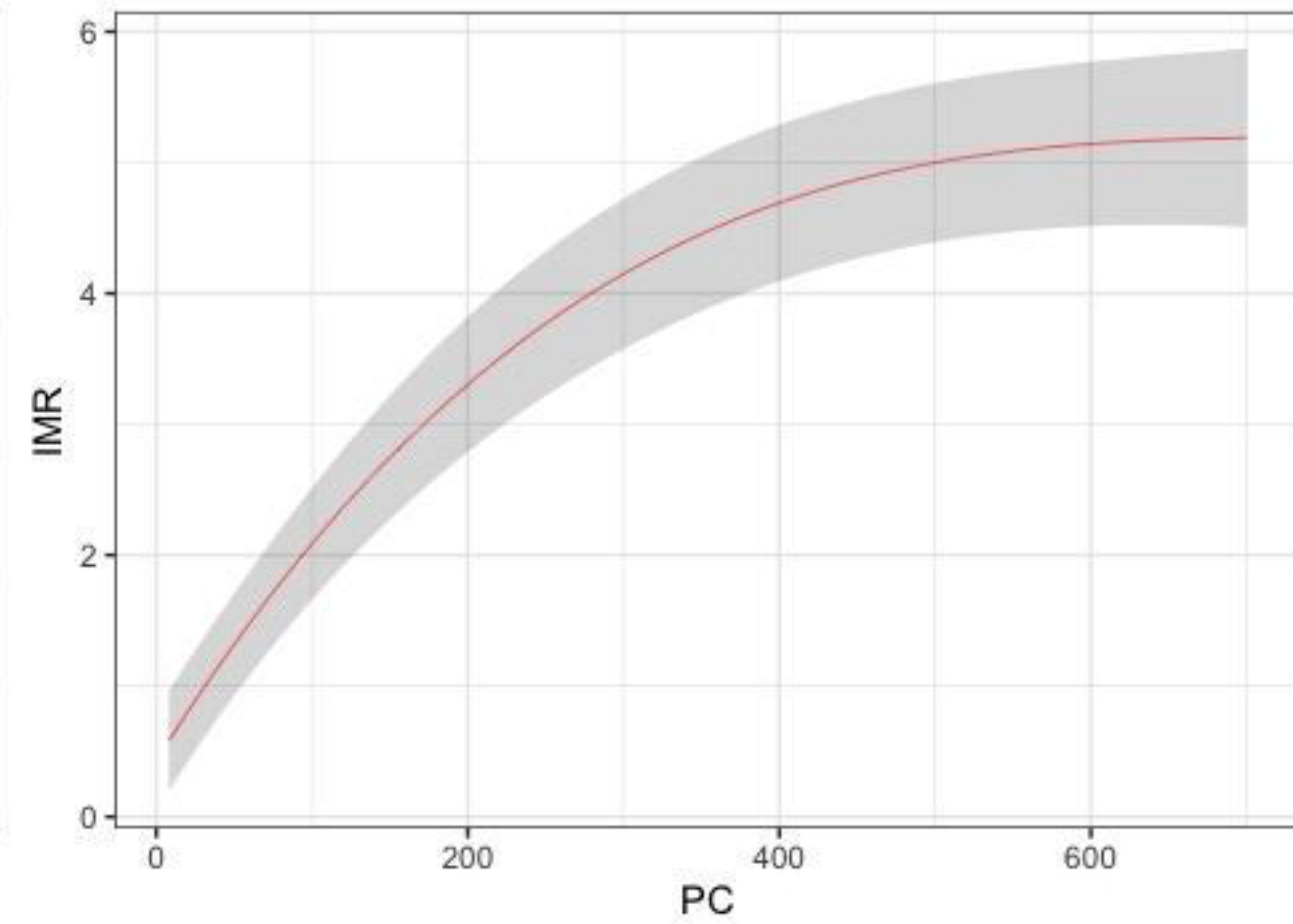

(c) The association between PC and U5MR

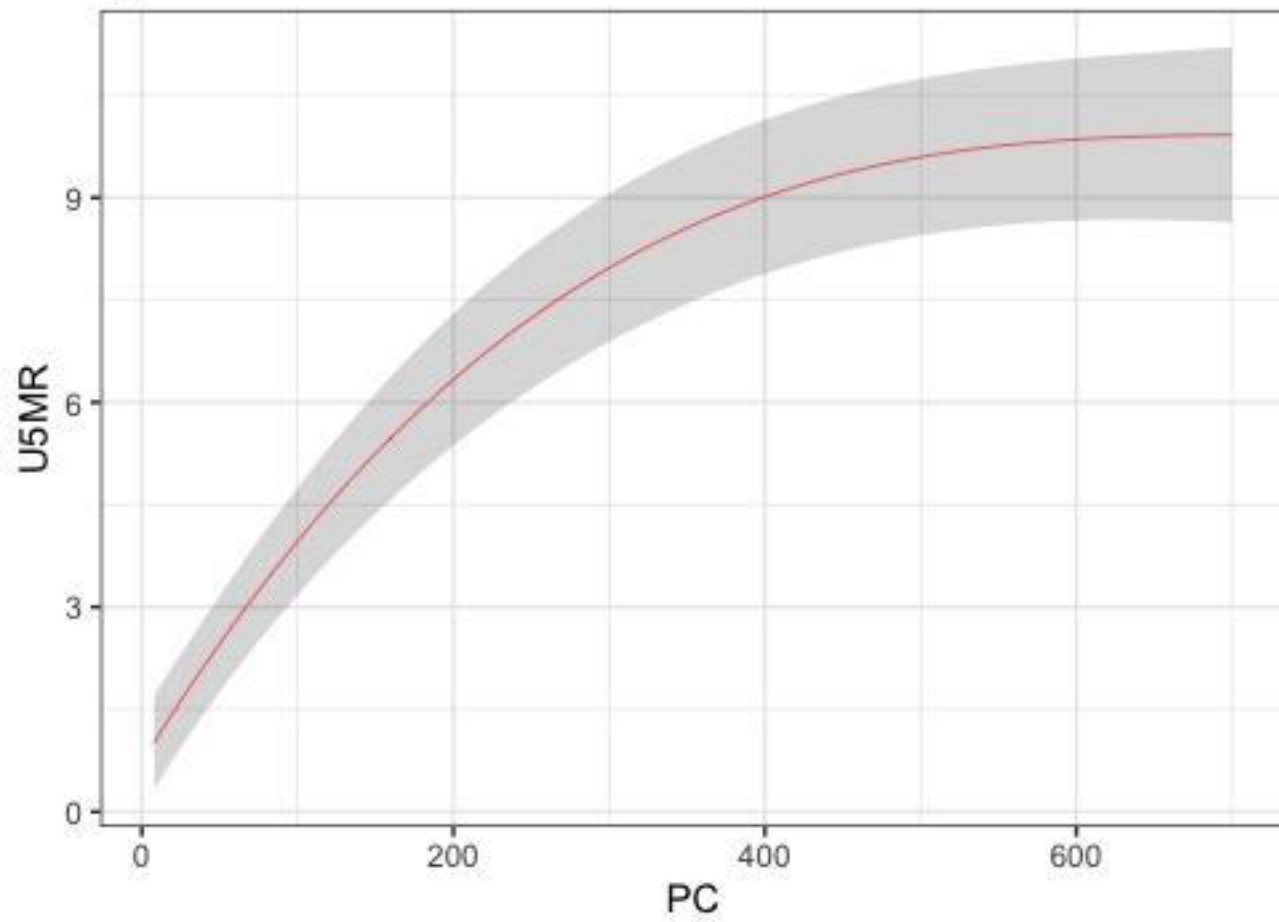

(d) The association between LPGDP and PC

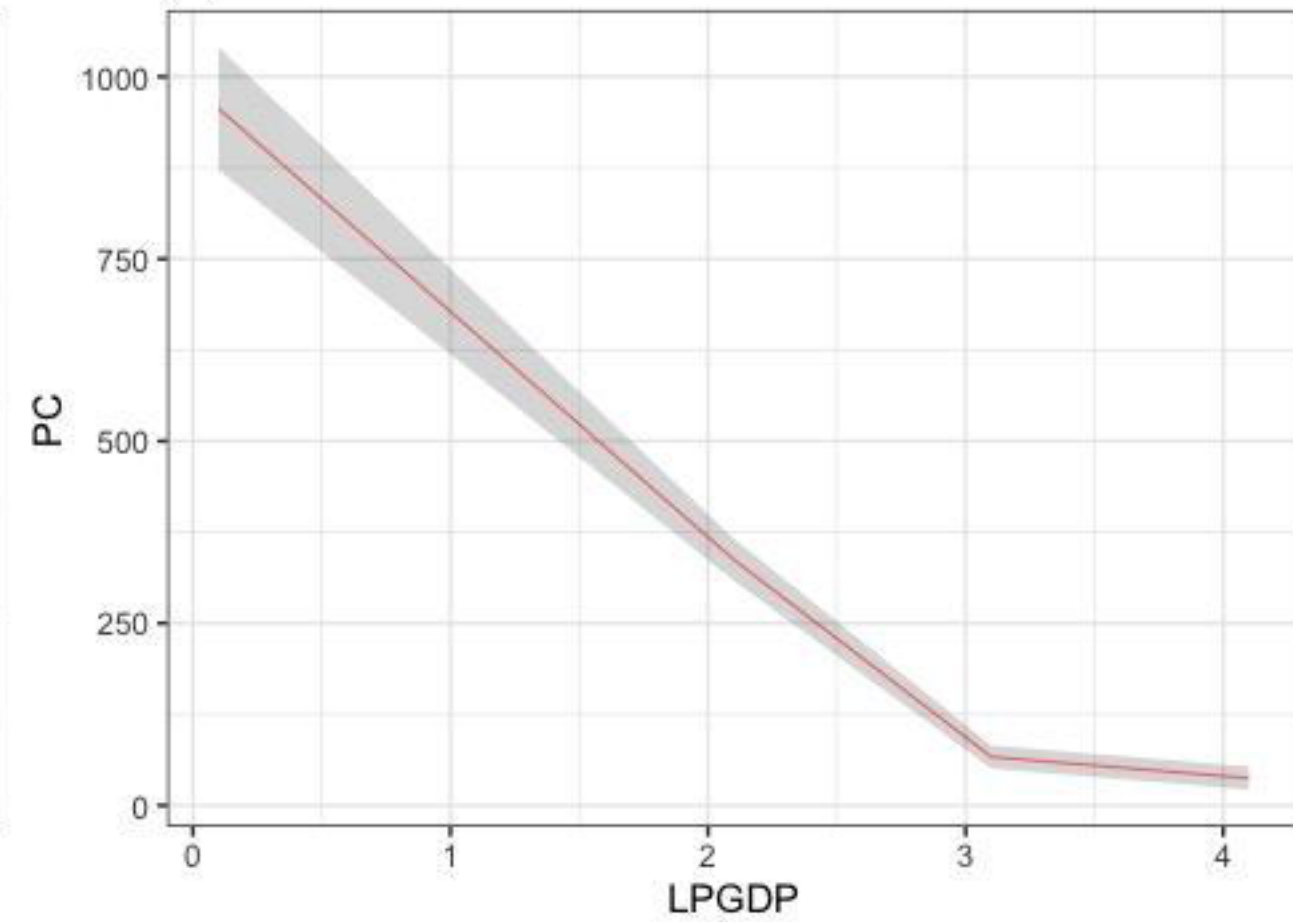

(a) The association between PC and LE

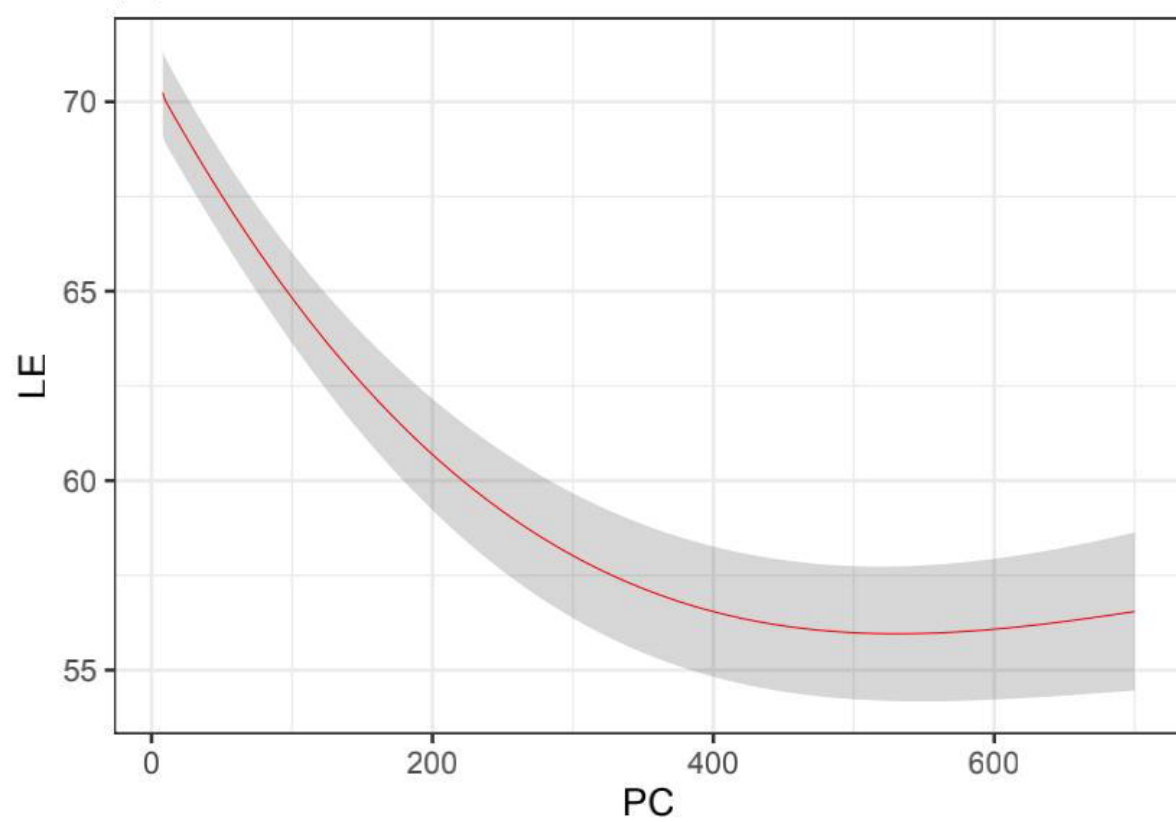

(b) The association between PC and IMR

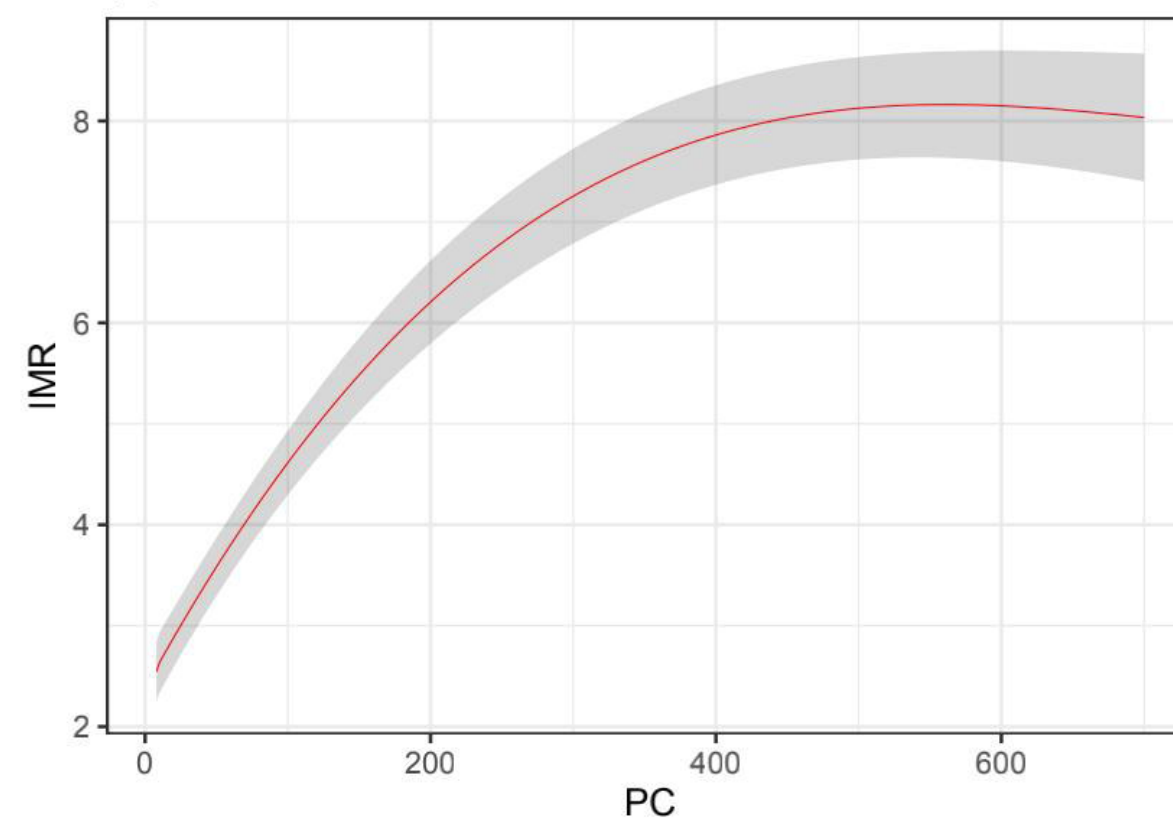

(c) The association between PC and U5MR

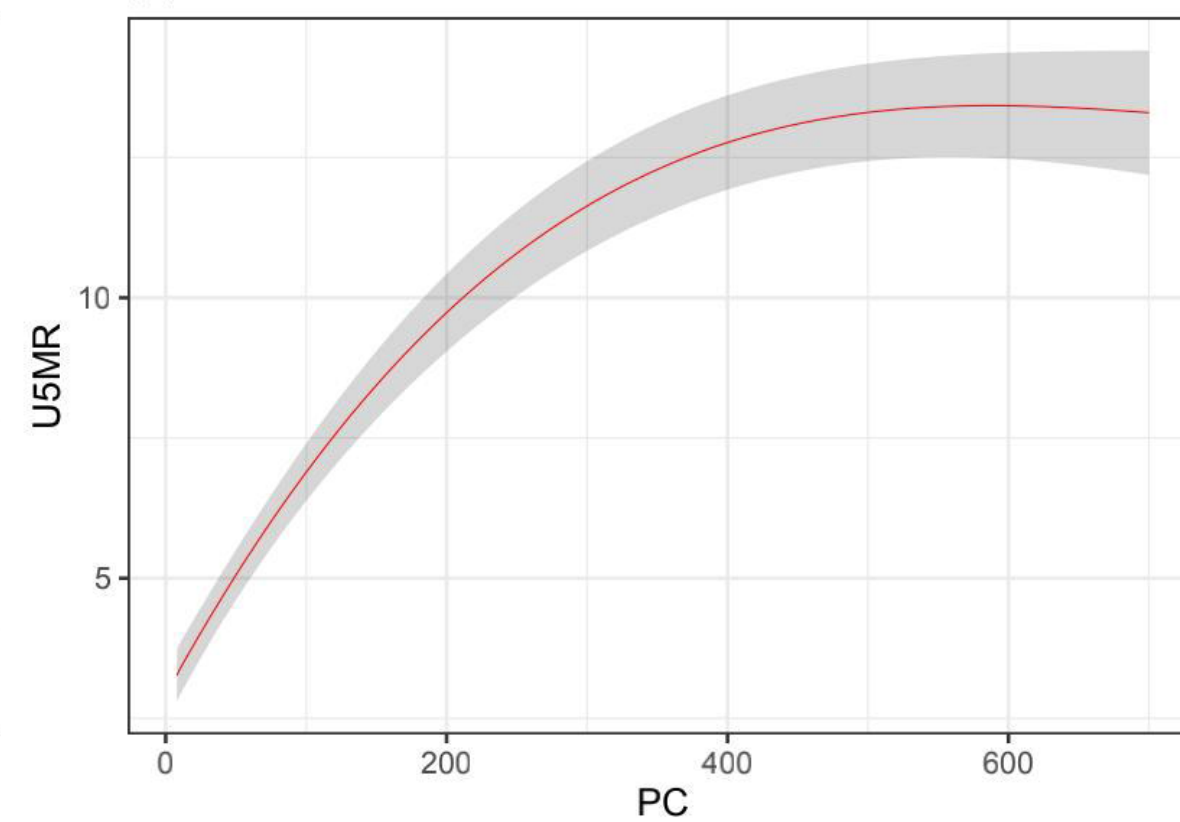

(d) The association between PC and LE

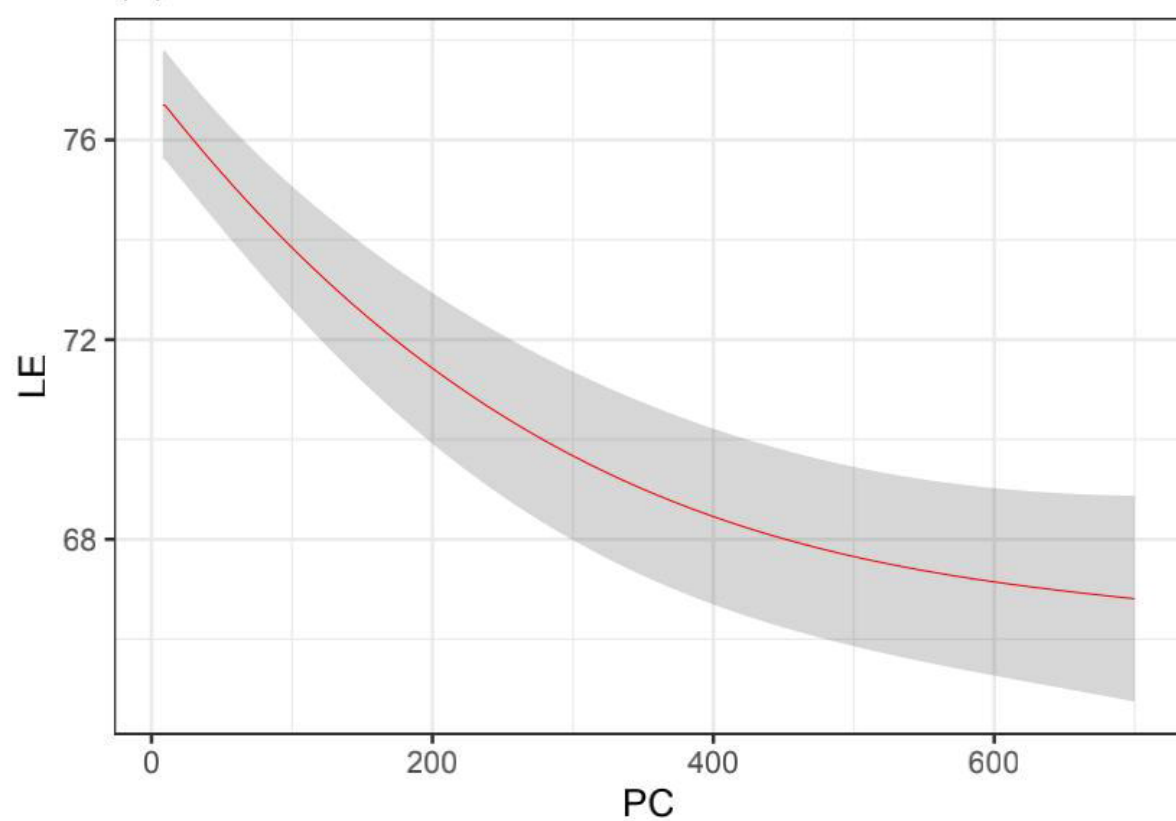

(e) The association between PC and IMR

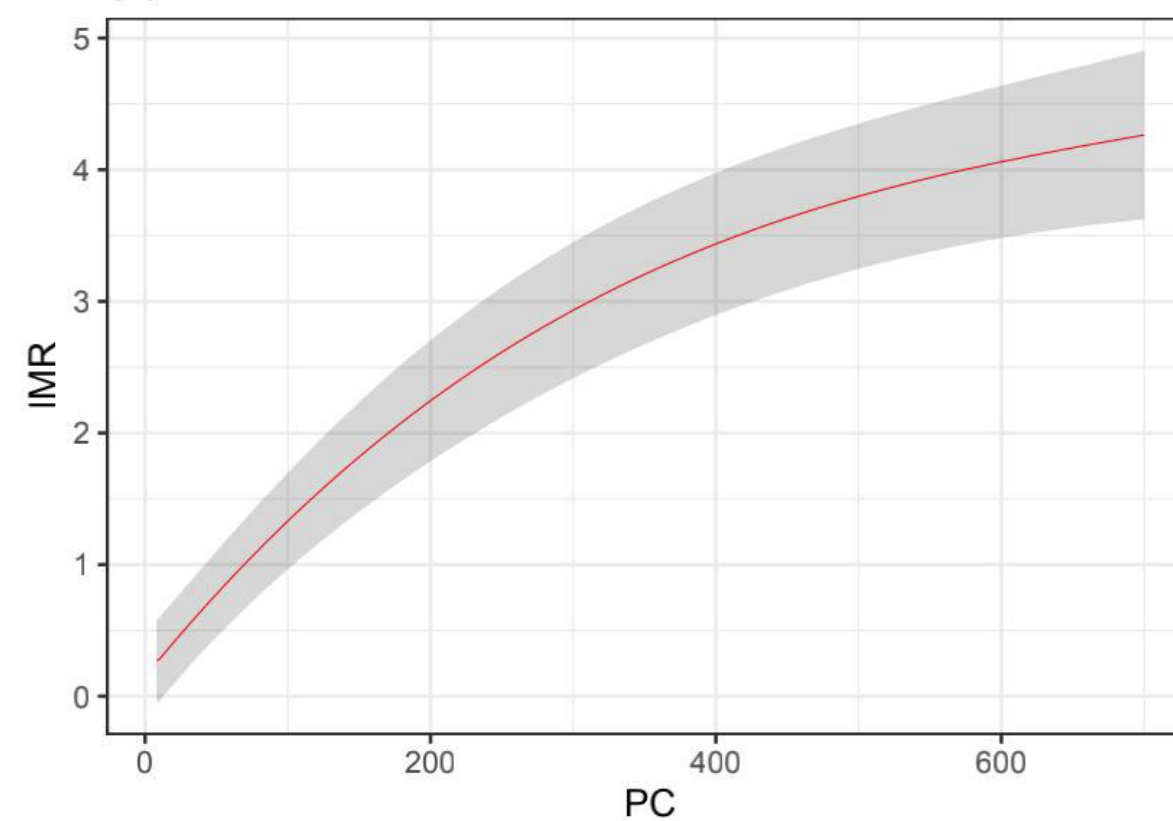

(f) The association between PC and U5MR

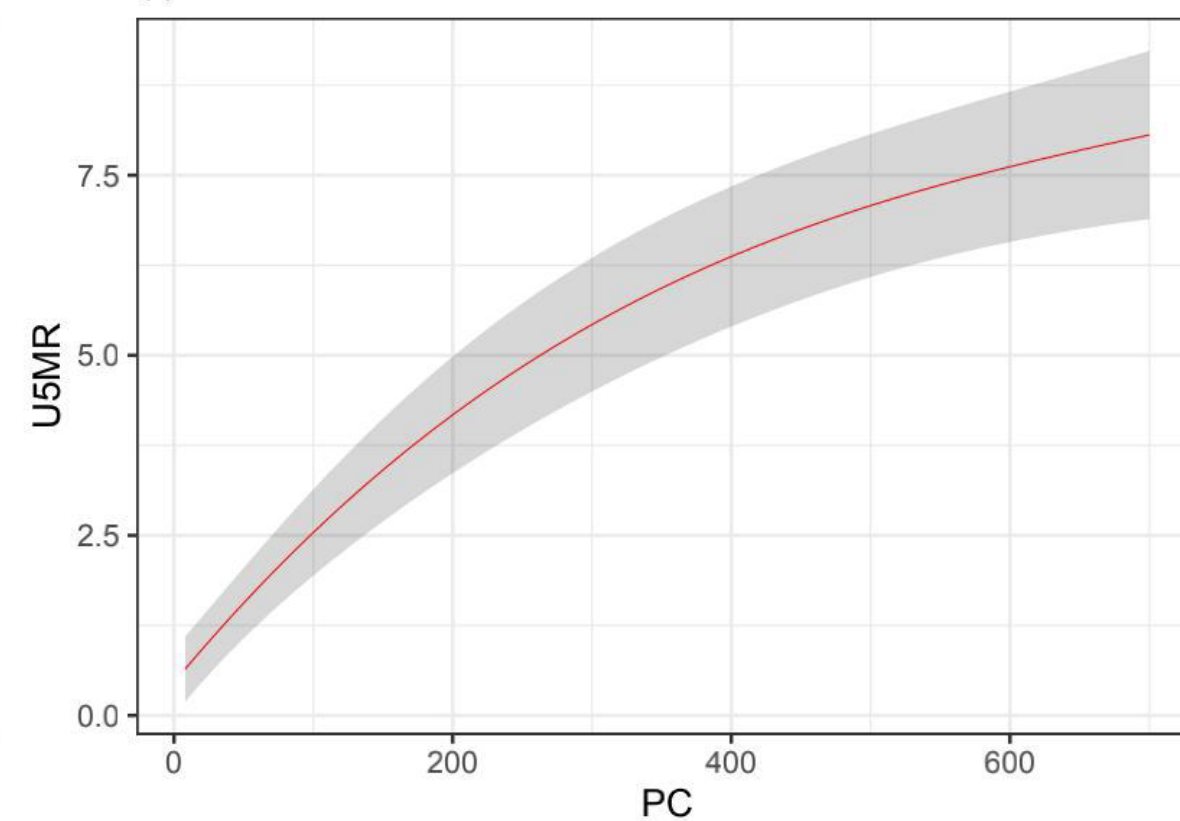

(g) The association between PC and LE

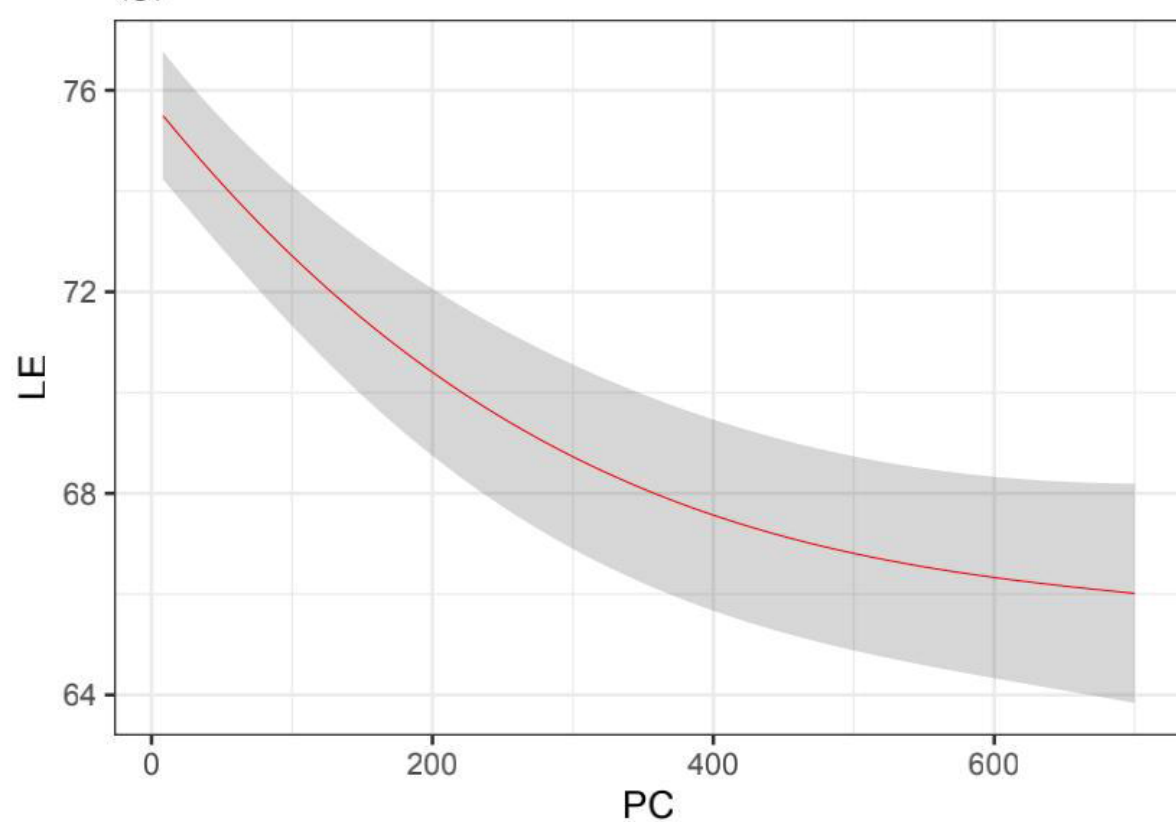

(h) The association between PC and IMR

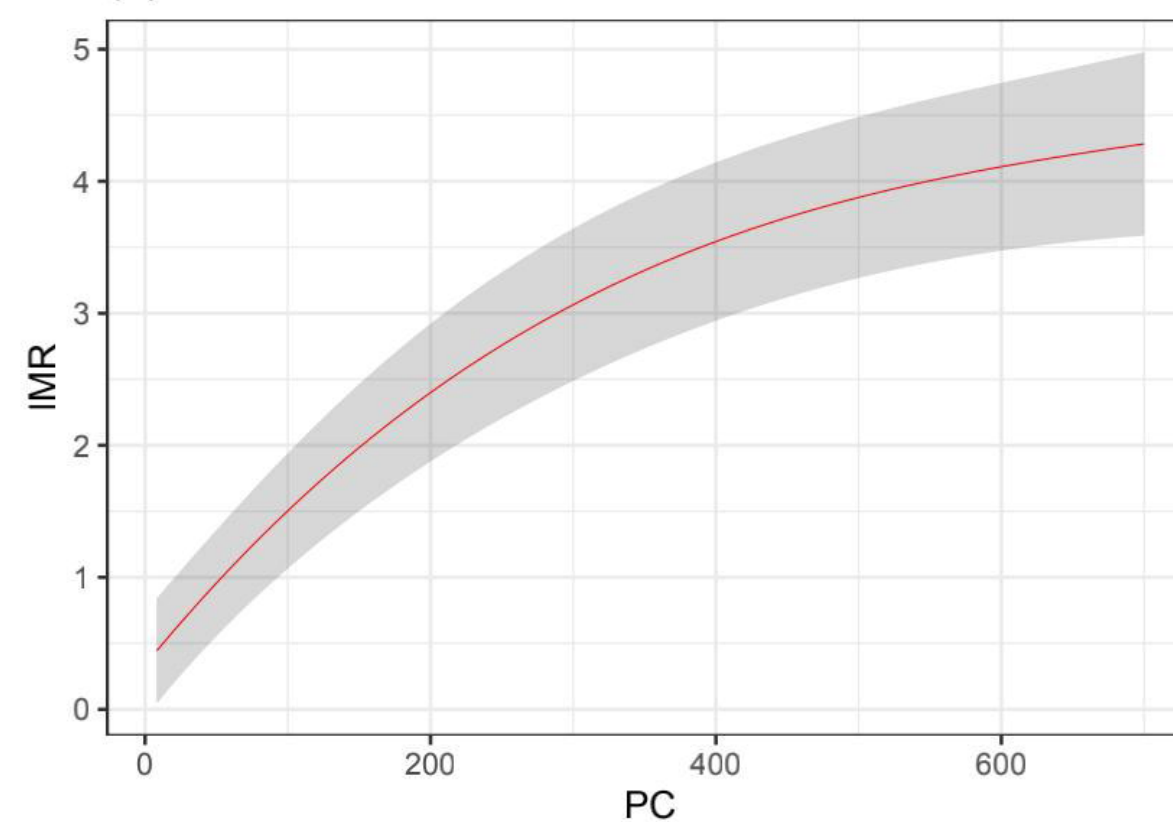

(i) The association between PC and U5MR

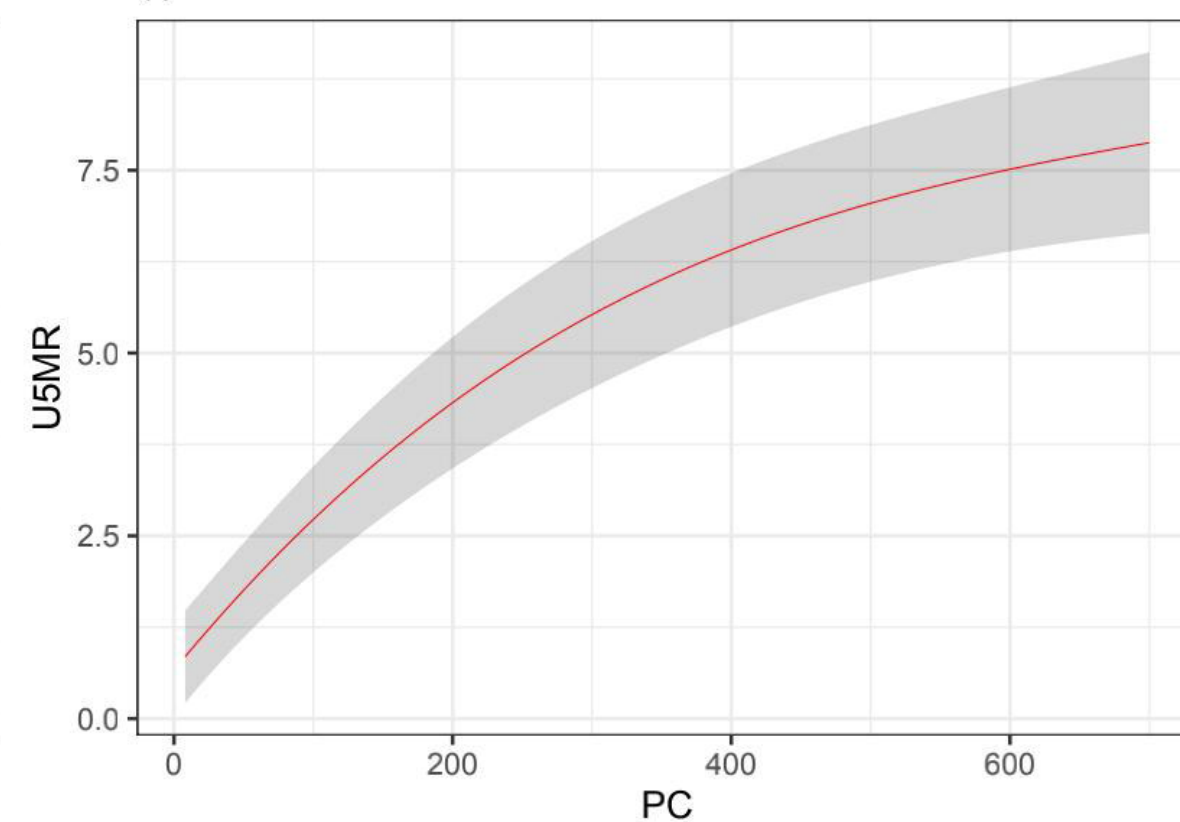

Source: https://medrxiv.org/content/10.1101/2020.05.31.20118752v1.full.pdf
